1 **Title: A NANOG-pERK reciprocal regulatory circuit mediates *Nanog***  
2 **autoregulation and ERK signaling dynamics.**

3  
4 **Author line:**

5 Hanuman T Kale, Rajendra Singh Rajpurohit, Debabrata Jana, Vishnu V Vijay, Mansi  
6 Srivastava, Preeti R Mourya, Gunda Srinivas, P Chandra Shekar\*

7 CSIR-Centre for Cellular and Molecular Biology, Uppal Road, Hyderabad, Telangana, India  
8 500007.

9 \*Correspondence: [csp@ccmb.res.in](mailto:csp@ccmb.res.in)

10

11 **The self-renewal and differentiation potential of Embryonic stem cells (ESCs) is**  
12 **maintained by the regulated expression of core pluripotency factors. The expression**  
13 **level of core pluripotency factor *Nanog* is tightly regulated by a negative feedback**  
14 **autorepression loop. However, it remains unclear how the ESCs perceive the**  
15 **NANOG levels and execute autorepression. Here, we show that a dose-dependent**  
16 **induction of *Fgfbp1* and *Fgfr2* by NANOG activates an autocrine mediated ERK**  
17 **signaling in high-*Nanog* cells to trigger autorepression. pERK recruits NONO to**  
18 ***Nanog* locus to repress transcription by preventing POL2 loading. The *Nanog***  
19 **autorepression process establishes a self-perpetuating NANOG-pERK reciprocal**  
20 **regulatory circuit. We further demonstrate that the reciprocal regulatory circuit**  
21 **induces the pERK heterogeneity and ERK signaling dynamics in pluripotent stem**  
22 **cells.**

23

24 Embryonic stem (ES) cells are characterized by long-term self-renewal and the potential  
25 to differentiate to all cell types of the germ layers. ES cells cultured in presence of serum  
26 and LIF manifest transcriptional and functional heterogeneity. The heterogeneous  
27 expression of transcription factors like *Nanog*, *Rex1*, *Stella*, *Esrrb*, *Klf4*, and *Tbx3*  
28 determine differential fate choice(1-9). The core pluripotency factor, *Nanog* was  
29 identified as a factor conferring LIF independent self-renewal to ES cells by inhibiting  
30 differentiation(10, 11). *Nanog* switches between mono-allelic and bi-allelic expression  
31 during embryonic development and in alternate pluripotency states(3, 12). The  
32 expression of *Nanog* is restricted in ES cells to ensure their potential to differentiate by  
33 negative feedback autorepression and other repressive mechanisms(13-19). Among the  
34 multiple mechanisms that regulate *Nanog*, which mechanisms are utilized by the  
35 pluripotent cells to restrict *Nanog* by autorepression remain unknown Although *Nanog*

36 autorepression was shown to operate independently of OCT4/SOX2(16) and dependent  
37 on ZFP281(13), it is unclear how the NANOG protein levels are perceived by cells to  
38 trigger autorepression. Here, we show that ERK signaling is essential for *Nanog*  
39 autorepression. NANOG induces *Fgfr2* and *Fgfbp1* exclusively in the high-*Nanog* ESCs  
40 to trigger feedback repression by autocrine-mediated activation of ERK signaling. We  
41 show that pERK1/2 recruits NONO to the *Nanog* locus to repress *Nanog* transcription  
42 by affecting POL2 loading. We show that the *Nanog* autoregulation process results in a  
43 self-perpetuating NANOG-pERK reciprocal regulatory loop. Our results establish that  
44 the NANOG-pERK reciprocal regulatory loop is the basis of ERK signaling dynamics  
45 and pERK1/2 heterogeneity in pluripotent stem cells. Together with our data show that  
46 the NANOG-pERK axis may not merely be viewed as a mechanism to regulate *Nanog*,  
47 but also a mechanism by which ERK dynamics and heterogeneity is induced in the  
48 pluripotent cells.

49

## 50 **Results**

51

### 52 **Residual MEK1/2 activity in the ground state prevents complete derepression of** 53 ***Nanog*.**

54 Transcriptional regulation is the major mechanism regulating *Nanog*  
55 heterogeneity, biallelic expression, and autorepression(13). To uncouple the influence of  
56 MEK1/2 and GSK3 $\beta$  on *Nanog* expression in naïve state of pluripotency, we analyzed  
57 the activity of *Nanog* promoter reported by GFP in T $\beta$ C44Cre6 cell line(1) in  
58 combinations of MEK1/2 and GSK3 $\beta$  inhibitors. T $\beta$ C44Cre6 cell line is *Nanog* null ESC  
59 in which a Neomycin resistance cassette is knocked in into one allele of *Nanog* and GFP  
60 into another allele. *Nanog* expression was derepressed above the basal level (SL) in all  
61 treatments. *Nanog* promoter activity was higher in SLPD relative to 2iL (Fig. 1A). To  
62 analyze NANOG protein dynamics, we generated a NiRFP2A cell line with both  
63 endogenous alleles of *Nanog* expressing NANOG-IRFP fusion protein (Fig. S1A).  
64 Higher NANOGiRFP in SLPD (Fig. 1B), confirmed the highest induction of *Nanog*  
65 transcript and protein in SLPD. To dismiss the interference of genetic modifications in  
66 the *Nanog* locus on its expression(20); we analyzed its expression in E14Tg2a cells. The  
67 *Nanog* transcript (Fig. 1C), transcriptional activity (Fig. 1D), and protein (Fig. 1E) were  
68 highest in SLPD, unlike OCT4 protein which changed very little (Fig. 1C-E, Fig. S1B).  
69 SLPD and 2iL contain 1  $\mu$ M PD, higher *Nanog* expression in SLPD indicated inefficient

70 repression of *Nanog* in 2iL/SL2i. We analyzed pERK1/2 to investigate possible  
71 modulation of MEK1/2 activity by GSK3 $\beta$  (21). The pERK1/2 remained undetectable  
72 for up to 4 hrs in SLPD and 2iL/SL2i. It gradually increased in 2iL after 8 hrs but  
73 remained undetectable in SLPD (Fig. 1F, Fig. S1C). The pERK1/2 in SLCHIR and 2iL  
74 significantly exceeded SL and SLPD respectively by 24 hrs (Fig. 1G, Fig. S1D),  
75 suggesting a long-term CHIR treatment enhanced MEK1/2 activity in ESCs. Further, the  
76 PD and CHIR dose-responsive experiments confirmed that the pERK1/2 positively  
77 correlated with the CHIR concentrations (Fig. 1H, I, Fig. S1E-H). Collectively, our data  
78 demonstrate that *Nanog* attains higher expression in MEK1/2 inhibition than in 2iL.  
79 GSK3 $\beta$  activity negatively modulates MEK1/2 activity and its inhibition by CHIR  
80 increases pERK1/2 in 2iL over time.

81

## 82 **FGF autocrine signaling pathway components are essential for *Nanog*** 83 **autoregulation.**

84

85 We asked if all repressive mechanisms including the *Nanog* autorepression are  
86 abolished in SLPD. We generated two NANOG restoration systems by integrating Flag-  
87 Avi-NANOG-ER<sup>T2</sup> (NANOGER<sup>T2</sup>) and a Doxycycline-inducible Flag-Avi-NANOG  
88 (FaNANOG) transgene in T $\beta$ c44Cre6(1) to derive the TNERT and TDiN cell lines  
89 respectively (Fig. 2A, Fig. S2A, B). The repression of endogenous *Nanog*:GFP upon  
90 induction of transgenic NANOG by OHT/Dox is a functional readout of *Nanog*  
91 autoregulation. *Nanog*:GFP was repressed in OHT/Dox induced TNERT/TDiN in all  
92 treatments except SLPD (Fig. 2A, Fig. S2C, D). The data from distinct induction systems  
93 conclusively establish an essential role of MEK1/2 in *Nanog* autoregulation.

94 FGF signaling is the predominant inducer of MEK/ERK in pluripotent cells(22,  
95 23), we investigated its role in autoregulation. NANOGER<sup>T2</sup>/FaNANOG failed to  
96 repress *Nanog*:GFP in presence of FGFR inhibitor, suggesting an essential role of FGFRs  
97 (Fig. 2B, Fig. S2E). FGFR1, FGFR2, and FGF4 are major receptors and ligands of FGF  
98 signaling in early embryos(24, 25). FGFBP1 is a carrier protein expressed from early to  
99 late blastocyst (Fig. 2C)(26) that enhances FGF signaling(27). We deleted *Fgfr1*, *Fgfr2*,  
100 *Fgf4*, and *Fgfbp1* in TNERT cells to analyze their role in autoregulation (Fig. 2D, Fig.  
101 S2F-I). Except in TNERTFgfr1<sup>-/-</sup>, *Nanog*:GFP was not repressed in TNERTFgfr2<sup>-/-</sup>,  
102 TNERTFgf4<sup>-/-</sup> and TNERTFgfbp1<sup>-/-</sup> cells upon OHT induction (Fig. 2E). Our data  
103 suggest that FGF autocrine signaling and its components FGFR2, FGF4, and FGFBP1  
104 are essential for *Nanog* autoregulation.

105

106 **NANOG enhances the expression of FGFR2, FGF4, and FGFBP1.**

107

108 We analyzed the expression of FGF autocrine signaling components during the  
109 time course of OHT induction. *Fgf4*, *Fgfr2*, *Fgfr1*, and *Fgfbp1* transcripts were induced  
110 within 1-2 hrs (Fig. 3A). Increased pre-mRNA indicated transcriptional activation of  
111 these genes (Fig. 3B). ChIP-seq data analysis identified NANOG occupancy on *Fgf4*,  
112 *Fgfbp1*, *Fgfr1*, and *Fgfr2*, which was further enhanced in *Oct4*<sup>+/-</sup> cells that have higher  
113 NANOG (Fig. S3A)(28). To analyze the dosage-dependent occupancy of NANOG on  
114 these genes, we generated EDiN cell line by introducing a Doxycycline-inducible  
115 FaNANOG transgene in E14Tg2a. ChIP-PCR confirmed NANOG occupancy on *Fgf4*,  
116 *Fgfbp1*, *Fgfr1*, and *Fgfr2*, which was further enhanced in PD (Fig. 3C) and EDiN+Dox  
117 (Fig. 3D) which express higher NANOG. The data suggest a dose-dependent occupancy  
118 of NANOG on the FGF signaling component genes. FGFR1, FGFR2, and pERK1/2 were  
119 significantly increased upon OHT induction in TNERT (Fig. 3E). The strength of FGF  
120 signaling depends on facilitation by carrier proteins(27), the affinity of ligands(29, 30)  
121 and subsequent subcellular trafficking of the FGFRs(31, 32). The induction of  
122 NANOG<sup>T2</sup> enhanced FGFR2 on the cell surface (Fig. 3F), unlike the FGFR1 (Fig.  
123 S3B) suggesting NANOG specifically enhances FGFR2. Intriguingly, FGFR2  
124 expression exhibited a negatively skewed bimodal distribution resembling *Nanog*  
125 expression(1) (Fig. 3F). The NANOG<sup>T2</sup> induction increased FGF4 and FGFBP1  
126 secretion by TNERT (Fig. 3G, H, Fig. S3C, D). Collectively the data shows that  
127 increased NANOG enhances FGFR2 on the cell surface, and secretion of FGF4 and  
128 FGFBP1 to intensify the FGF autocrine signaling. NANOG induces and enhances FGF  
129 autocrine signaling through FGFR2 to execute *Nanog* autoregulation.

130

131 ***Nanog* autoregulation is a cell non-autonomous process mediated by FGF**  
132 **autocrine/paracrine signaling.**

133

134 *Nanog* autorepression is suggested to operate by a cell-autonomous process  
135 through intracellular proteins NANOG, ZFP281, and NURD complex(13). Cell non-  
136 autonomous function of *Nanog* in the induction of primitive endoderm(33, 34) and  
137 essentiality of secreted proteins FGF4 and FGFBP1 in autoregulation prompted us to  
138 investigate cell non-autonomous mechanisms. We assessed the ability of conditioned  
139 media from OHT induced TNERT cells, to repress *Nanog*:GFP in T $\beta$ c44Cre6 lacking

140 *Nanog* (Fig. 3I). The conditioned media was sufficient to repress the *Nanog*:GFP (Fig.  
141 3J, Fig. S3E), suggesting that autoregulation operates via cell non-autonomous  
142 mechanisms and discounts the direct role of NANOG in autoregulation as proposed  
143 earlier(13). NANOG seems to be essential for triggering autoregulation through FGF  
144 autocrine signaling but does not participate in repression. Further, the repression of  
145 *Nanog*:GFP in TNERTZfp281<sup>-/-</sup> cell line lacking Zfp281 (Fig. S3F) suggests that  
146 ZFP281 is dispensable for *Nanog* autoregulation (Fig. 3K).

147 To evaluate if FGF4 secretion was the causative factor of *Nanog* autoregulation  
148 in the conditioned media, we treated Tβc44Cre6 with conditioned media from cells with  
149 loss or gain of FGF4. The conditioned media from an E14Tg2a cell line overexpressing  
150 FGF4 or supplementation of FGF4 (50ng/ml) could repress *Nanog*:GFP. Conversely, the  
151 conditioned media from OHT induced TNERTFgf4<sup>-/-</sup> cells failed to repress *Nanog*:GFP,  
152 suggesting FGF4 is the key secreted factor essential for *Nanog* autoregulation (Fig. 3L,  
153 Fig. S3G). The ELISA analysis confirmed the secretion and accumulation of FGF4 and  
154 FGFBP1 in the conditioned media (Fig. S3H-K). Collectively, our data establish that  
155 *Nanog* autoregulation is a cell non-autonomous process triggered by NANOG by  
156 augmenting FGF autocrine signaling.

157

158 **NANOG induced FGFR2 triggers autoregulation predominately in the ES cell**  
159 **population with higher *Nanog* expression.**

160

161 *Nanog* autoregulation was proposed to restrict NANOG levels within limits to  
162 retain the differentiation potential(13, 16). Autoregulation is expected to operate only in  
163 *Nanog*-high cells in a population. To evaluate this logic, we used TDiN cell lines with  
164 different induction levels of FaNANOG (Fig. S4A). The strength of *Nanog*  
165 autoregulation was found to be dependent on the FaNANOG levels and was completely  
166 abolished in TDiN clones with low FaNANOG (Fig. S4B, C). Further, the *Nanog*:GFP  
167 was repressed only in 10% population of the TNERT with the highest *Nanog* expression  
168 but not in the lowest 10% (Fig. 4A). Our experiments conclude that *Nanog*  
169 autoregulation predominately operates in a subpopulation of cells with higher *Nanog*.

170 FGF4 and FGFBP1 are secreted proteins, hence cannot distinguish between the  
171 *Nanog*-high and low cells in culture. Whereas FGFRs are essential for autoregulation  
172 and are retained on the cells, we asked if FGFRs distinguish *Nanog*-high cells from low  
173 cells in a population. We analyzed the correlation between the expression of FGFR1,  
174 FGFR2, and NANOG in E14Tg2a by FACS. FGFR2 and FGFR1 showed a strong

175 correlation with NANOG, which was further enhanced for FGFR2-NANOG in SLPD  
176 ( $r=0.80$ ) whereas decreased for FGFR1-NANOG ( $r=0.59$ ) in SLPD (Fig. 4B,) where  
177 NANOG levels are higher. These data suggested FGFR2 but not FGFR1 expression  
178 levels correlate and respond to NANOG concentration in the cells. FACS analysis  
179 showed high FGFR2 in the 10% NANOG high population and lower FGFR2 in the 10%  
180 NANOG low population (Fig. 4C). We analyzed the NANOG binding sequences in the  
181 *Fgfr2* locus. Two NANOG binding regions (NBR) with multiple NANOG binding  
182 sequences were identified in the *Fgfr2* locus from the ChIP-seq(28), NBR1 at 1.4 kb,  
183 and NBR2 at -0.2 kb relative to TSS of *Fgfr2*. NBR1 and NBR2 were deleted in TNERT  
184 (Fig. 4D, E, Fig. S4D, E). Autoregulation was operational in TNERTNBR1<sup>-/-</sup> albeit at  
185 reduced strength, whereas it was abolished in TNERTNBR2<sup>-/-</sup> (Fig. 4F), suggesting that  
186 NBR2 is essential for the binding of NANOG and activation of *Fgfr2* to trigger  
187 autoregulation. Together, our data suggest dose-responsive induction of *Fgf4*, *Fgfbp1*,  
188 and *Fgfr2* by NANOG. The *Nanog*-high cells secrete more FGF4 and FGFBP1, also  
189 express higher FGFR2 receptors. The FGF4 in presence of FGFBP1 binds to FGFR2 to  
190 enhance FGF signaling in *Nanog*-high cells to enhance pERK1/2 and repress *Nanog*. The  
191 *Nanog*-low cells express relatively low FGFR2, resulting in weak FGF signaling and the  
192 absence of autoregulation (Fig. 4G). We propose that FGFR2 distinguish the *Nanog*-high  
193 cells from the low cells to activate ERK-driven autoregulation selectively in *Nanog*-high  
194 cells.

195

#### 196 **ERK1/2 interacts and recruits NONO to repress *Nanog* transcription.**

197

198 FGF signaling represses *Nanog* transcription(18, 35) and regulates *Nanog*  
199 heterogeneity and monoallelic expression(12, 36, 37). How FGF signaling downstream  
200 kinases repress *Nanog* is unclear. ERK can induce *Tcf15* to repress *Nanog*(38) or it can  
201 interact with NONO to regulate bivalent genes(39). We deleted *Tcf15* and *Nono* in  
202 TNERT to generate TNERTTcf15<sup>-/-</sup> and TNERTNono<sup>-/-</sup> cell lines to examine their  
203 function in autoregulation (Fig. 5A, Fig. S5A, B). OHT treatment failed to repress  
204 *Nanog*:GFP in TNERTNono<sup>-/-</sup>, unlike in TNERTTcf15<sup>-/-</sup> indicating an essential role of  
205 NONO but not TCF15 (Fig. 5B, Fig. S5A, C). NONO has been shown to activate  
206 ERK1/2(39), and pERK1/2 was substantially reduced in TNERTNono<sup>-/-</sup> despite OHT  
207 induction, unlike in TNERT (Fig. 5C, Fig. S5D). Endogenous immunoprecipitation  
208 showed an interaction between NONO and ERK1/2, the interaction was maintained in  
209 the presence or absence of NANOG (Fig. 5D). NONO colocalizes with ERK1/2 to



210 bivalent developmental genes to maintain poised POL2(39). The ChIP-seq data analysis  
211 from Ma et. al.,(39) and Tee et. al.,(40) showed NONO and ERK1/2 occupancy on the  
212 *Nanog* (Fig. S5E). We induced or repressed the pERK1/2 by treatment of E14Tg2a cells  
213 with FGF4 or PD (Fig. 5E) and analyzed the occupancy of NONO, pERK1/2, POL2,  
214 H3K4me3, and H3K27me3. The transcription start site (TSS) and 5 kb upstream region  
215 (-5kb) are the two hubs of transcription factor binding and control of *Nanog*  
216 transcription(41, 42). We performed ChiP-qPCR analysis with multiple primer sets  
217 spanning the -5.8 kb to +1.5 kb region relative to TSS (Fig. 5F). pERK1/2 and NONO  
218 binding was detected in immediate downstream regions of the -5kb, and TSS. Their  
219 binding was reduced significantly in PD and enhanced in FGF4 suggesting pERK1/2 and  
220 NONO binding on *Nanog* is dependent on FGF signaling (Fig. 5G, H). pERK1/2 was  
221 shown to recruit NONO to bivalent genes(39). Although *Nanog* is not a bivalent gene,  
222 our data suggests pERK1/2 recruits NONO to *Nanog*. POL2 occupancy seen in TSS and  
223 downstream region was reduced in FGF4 and enhanced in PD treatment suggesting  
224 active transcription of *Nanog* in PD and repression in FGF4 (Fig. 5I). This was  
225 corroborated with enhanced enrichment of the transcription activating histone mark  
226 H3K4me3 in PD (Fig. 5J) and enrichment of transcription repressive mark H3K27me3  
227 at the -5kb region of the *Nanog* in FGF4 treatment (Fig. 5K). pERK1/2 phosphorylates  
228 NANOG, USP21 and affects NANOG stability and transactivation capability(19, 43,  
229 44). In agreement with NANOG destabilization by pERK1/2(19, 43, 45), The half-life  
230 of NANOG was significantly compromised in FGF4 treated cells but enhanced in PD  
231 (Fig. 5L, Fig. S5F), suggesting that the FGF/ERK represses *Nanog* transcription and also  
232 affects NANOG stability. Collectively, these data suggest that FGF signaling activates  
233 pERK1/2 and its binding onto *Nanog* in a concentration-dependent manner. pERK1/2 is  
234 essential for the recruitment of NONO to the *Nanog* locus. pERK1/2-NONO are known  
235 to poise the POL2 in bivalent genes(39). In contrast, pERK1/2-NONO affects POL2  
236 loading onto the *Nanog* locus preventing the initiation of transcription. In the absence of  
237 active FGF signaling, pERK1/2-NONO occupancy on the *Nanog* is decreased permitting  
238 increased POL2 loading and transcription activation of the *Nanog* (Fig. 5M).

239

## 240 **NANOG regulates ERK signaling dynamics and heterogeneity**

241

242 ERK signaling regulates *Nanog* expression and heterogeneity in ES cells. Recently  
243 pERK1/2 expression is reported to be heterogeneous and dynamic in ES cells and the  
244 preimplantation embryos(24, 25, 46). We have shown that FGFR2 exhibits a negatively

245 skewed bimodal expression similar to *Nanog* in ESCs (Fig. 3F) and *Fgfr2* is induced in a  
246 dosage-dependent manner by NANOG. We asked if NANOG dynamics could regulate  
247 ERK signaling dynamics in ES cells through *Fgfr2*. Immunostaining showed  
248 heterogeneous expression of NANOG and pERK1/2 in WT ESCs (E14Tg2a) with some  
249 cells co-expressing both (Fig. 6A). Their expression showed a strong correlation  
250 ( $r=0.6675$ ) suggesting a positive association between NANOG and pERK1/2; similar to  
251 NANOG and FGFR2. NANOG showed a broad range of expression as represented by the  
252 broad range of relative fluorescence intensity (RFI 0-20000), pERK1/2 showed a  
253 relatively narrow range of expression (RFI 1500-3000) in ESCs (Fig. 6B). The pERK1/2  
254 expression in *Nanog* null ESC (TBC44Cre6) was very low relative to WT ESCs (RFI  
255  $<2000$ ), suggesting pERK1/2 levels are dependent on NANOG. NANOG overexpression  
256 in WT ESCs (EDiN) enhanced pERK1/2 levels by multiple folds relative to WT and  
257 broadened the range of pERK1/2 levels (RFI  $>30000$ ) (Fig. 6A) with a moderate  
258 correlation between NANOG and pERK1/2 ( $r = 0.5375$ ) (Fig. 6B). Intriguingly, high  
259 levels of pERK1/2 failed to repress *Nanog* transgene and significantly reduce NANOG in  
260 EDiN. This resulted in the coexistence of high pERK1/2 and high NANOG in the cells.  
261 Despite very high levels of pERK1/2, *Nanog* over-expressing EDiN does not differentiate  
262 suggesting that the *Nanog* function in ESC self-renewal is dominant over the pERK1/2  
263 function in the differentiation of ESCs. These data suggest that pERK1/2 expression levels  
264 and dynamic range of expression in ESCs are dependent on the expression level of *Nanog*  
265 and its dynamics. To further validate this, we isolated *Nanog*-high subpopulation cells by  
266 sorting the highest 10% iRFP expressing NiRPF2A reporter ESCs by FACS. The  
267 expression of pERK1/2 and NANOG was analyzed in these cells every 4 hours during  
268 their culture to study the dynamics of NANOG and pERK expression. The sorted cells  
269 expressed NANOG and pERK1/2. After 4 hours of culture in fresh media, the NANOG  
270 expression increased with a concomitant decrease in pERK1/2 (NANOG high-pERK1/2  
271 low state). After 8 hours, the NANOG expression decreased and the pERK1/2 expression  
272 increased. At 12 hrs the cells showed relatively low pERK1/2 and low NANOG  
273 expression (Fig. 6C). A relative median fluorescence intensity plot of NANOG and  
274 pERK1/2 suggests that NANOG and pERK1/2 follow a dynamic cycle of expression  
275 during culture (Fig. 6D). This was further confirmed by immunostaining and imaging of  
276 the sorted cell line at every 4 hr intervals (Fig. S6A). These results suggest that ESCs  
277 continuously transit between different states of NANOG and pERK1/2 expression  
278 resulting in heterogeneous and dynamic expression pERK1/2.

279



## 280 Discussion

281

282 We demonstrate that the highest possible expression of *Nanog* could be achieved  
283 in SLPD by attaining a consistent low MEK1/2 activity. Wnt signaling can activate  
284 MEK1/2 at multiple levels(21), a relatively lower level of *Nanog* expression in SL2i and  
285 2iL could be attributed to a time-dependent increase in MEK1/2 activity in presence of  
286 PD and CHIR (Fig. 1F, G). The inhibition of MEK1/2 prevents differentiation in 2iL,  
287 but a time-dependent increase in MEK1/2 activity is significant and sufficient to  
288 facilitate *Nanog* autoregulation. A time-dependent variation in MEK1/2 activity in 2iL  
289 opens up the plausibility of other molecular processes regulated by MEK1/2 activity to  
290 be functional in a naïve state.

291 Overexpression of *Nanog* is limited by an autorepression mechanism operating  
292 at the transcriptional level to retain the differentiation potential of ESCs(13, 16). Among  
293 the multiple possible pathways that can regulate *Nanog*(17, 35, 38, 44), we show that  
294 FGF autocrine signaling is recruited for *Nanog* autoregulation. We show that a NANOG  
295 dosage-dependent differential induction of *Fgfr2* in *Nanog*-high ESCs triggers  
296 autoregulation by activation of ERK1/2. pERK1/2 recruits NONO to the *Nanog* locus  
297 and affects the loading of POL2 onto the *Nanog* locus reducing *Nanog* transcription (Fig.  
298 5M). Other reports(19, 43) and our data show that pERK1/2 can affect NANOG stability  
299 and may contribute to autorepression. However, the inability of pERK1/2 to significantly  
300 repress NANOG expressed from a transgene and a strong correlation between NANOG-  
301 pERK1/2 (Fig. 6A, B) dismisses the possibility of significant contribution from post-  
302 transcriptional mechanisms in autoregulation. Our data suggest that *Nanog*  
303 autoregulation is triggered above a threshold of NANOG, thereafter the intensity of  
304 repression is dependent on the level of NANOG in the cell.

305 We show that NANOG activates ERK signaling by inducing *Fgfr2*, *Fgf4*, and  
306 *Fgfbp1*. The activated ERK1/2 together with NONO represses transcription of *Nanog*,  
307 resulting in a NANOG-pERK1/2 reciprocal regulatory loop (Fig. 6E). The subpopulation  
308 of ES cells expressing high NANOG will have higher FGFR2. This induces high ERK  
309 activity resulting in a high-NANOG:high-pERK state. The repression of *Nanog*  
310 transcription by pERK in these cells reduces NANOG, reducing transcription of *Fgfr2*.  
311 The cells traverse through various intermediate levels of NANOG and pERK1/2  
312 resulting in a low-NANOG:low-pERK state. Low pERK1/2 permits activation of  
313 NANOG by other pluripotency factors gradually increasing NANOG in these cells. The  
314 increased NANOG activates *Fgfr2*, *Fgfbp1*, and *Fgf4* to induce ERK activity leading to

315 various intermediate levels of NANOG and pERK culminating in high-NANOG:high-  
316 pERK state. This induces a self-perpetuating cycle of activation of ERK signaling by  
317 NANOG and repression of *Nanog* by pERK1/2 leading to dynamic expression levels of  
318 NANOG and pERK1/2 in the ESC population (Fig. 6F).

319 pERK1/2 heterogeneity is suggested to be a vital determinant of fate choice in  
320 ICM and ES cells(24, 25, 45, 47, 48). The mechanism generating pERK1/2 heterogeneity  
321 is unclear. pERK1/2 heterogeneity may originate due to differential local concentrations  
322 of FGF4 or FGFBP1 or heterogeneous expression of receptors FGFRs or by negative  
323 feedback regulators (ETV5, DUSP1/6). *Nanog* is considered to induce FGF paracrine  
324 signaling through FGF4 secretion and specify primitive endoderm by cell-autonomous  
325 mechanisms(33, 34). Although FGF4 is essential for *Nanog* autoregulation, it is a  
326 secreted protein. Its induction by NANOG can neither explain the functioning of  
327 autoregulation exclusively in *Nanog*-high cells nor the heterogenous pERK1/2 activation  
328 in ESCs or ICM. FGFR1 is unlikely to induce ERK1/2 heterogeneity as it is relatively  
329 uniformly expressed in the epiblast(24, 25) and ESCs. Dosage-dependent induction of  
330 *Fgfr2* by NANOG and its accumulation on the surface of NANOG high cells can  
331 potentiate the cells to differentially respond to FGF4. Our data establish that the dosage-  
332 dependent induction of *Fgfr2* is the basis for differential activation of ERK1/2 in  
333 subpopulations of ESCs resulting in pERK1/2 heterogeneity. The carrier protein  
334 FGFBP1 may also locally enhance FGF signaling further contributing to pERK1/2  
335 heterogeneity similar to heparan sulfate proteoglycans(49).

336 We propose the reciprocal regulation of *Nanog* by ERK signaling and ERK  
337 signaling by NANOG as the basis for both NANOG and pERK1/2 heterogeneity. We  
338 suggest that the NANOG-pERK axis may not merely be viewed as a mechanism of  
339 regulation of *Nanog* expression by ERK signaling, rather as a cyclic circuit where *Nanog*  
340 heterogeneity and expression dynamics lead to ERK signaling dynamics and vice versa.  
341 *Nanog* and ERK signaling are induced in multiple cancers(50, 51). The significance of  
342 the NANOG-pERK1/2 reciprocal regulatory loop in establishing heterogeneity and ERK  
343 signaling dynamics may not be limited to pluripotent cells but could be relevant in cancer  
344 stem cells and tumor heterogeneity.

345

346

#### 347 **Acknowledgments**

348 HTK was supported by a fellowship from ICMR (India), DJ, VVV, MS was supported by  
349 a fellowship from UGC (India). RSR was supported by DBT grant No:  
350 BT/PR14064/GET/119/16/2015. PCS was supported by WT/DBT IA grant No:

351 500053/Z/09/Z. We thank the Microscopy, and FACS core facilities of CCMB for the  
352 support extended to carry out this work. We thank Ian chambers for his constructive  
353 comments on the manuscript.

354

### 355 **Author contributions**

356 Conceptualization, H.T.K, and P.C.S Methodology, H.T.K and P.C.S; Investigation,  
357 H.T.K, R.S.R., V.V.V., and G.S.; Writing – Original Draft, H.T.K. and P.C.S.; Writing –  
358 Review & Editing, H.T.K., and P.C.S.; Funding Acquisition, P.C.S.; Resources, H.T.K,  
359 R.S.R., M.S., and D.J.; Visualization, H.T.K, and D.J.; Supervision, P.C.S.

360

### 361 **Competing interest**

362 The authors declare no competing interests.

363

### 364 **Figure legends:**

365

### 366 **Fig. 1. Residual MEK1/2 activity in the ground state prevents complete derepression**

367 **of *Nanog*.** (A) (left) FACS profiles of T $\beta$ C44Cre6 cultured in indicated conditions for 3  
368 passages. T $\beta$ C44Cre6 is a *Nanog* null cell line, where  $\beta$ -*geo* cassette is inserted into one  
369 allele and GFP into another allele of the *Nanog* gene. The cells were cultured in  
370 Serum+LIF (SL) in presence of the 1  $\mu$ M MEK1/2 inhibitor -PD0325901 (SLPD) or 3  
371  $\mu$ M GSK3 $\beta$  inhibitor -CHIR99021 (SLCHIR) or in serum-free media - N2B27 with  
372 PD0325901, CHIR99021, and LIF (2iL). (right) *Nanog*:GFP population median of  
373 T $\beta$ C44Cre6 (n=3). (B) (Left) FACS profile of NANOG-iRFP protein in NiRFP2A cells  
374 cultured in indicated conditions for 3 passages. (right) *NANOG*-iRFP population median  
375 of NiRFP2A (n=4). (C) RT-qPCR of pluripotency factors in indicated conditions (SL2i=  
376 SL+ PD0325901+CHIR99021). (D) RT-qPCR analysis of pre- mRNA of *Nanog* and  
377 *Oct4*. (E) (left)Western blot of NANOG, OCT4, and SOX2. (right) Relative NANOG  
378 levels as estimated by densitometry (n=8). NANOG was nearly 7-fold more in PD, which  
379 is twice that of 2iL/SL2i. (F) Western blot of pERK1/2 and ERK1/2 at 0, 1, 4, 8, 12, 16,  
380 and 24 hrs after media change in indicated treatments. (G) Western blot of pERK1/2 and  
381 ERK1/2 in SLPD, SLCHIR, 2iL, and SL2i after 8, 12, 16, and 24 hrs of culture relative  
382 to SL, where the cells in SL were harvested 24 hrs after the media change. (H)  
383 (left)Western blot of pERK1/2 and ERK1/2 in 1 $\mu$ M PD and increasing concentrations of  
384 CHIR in serum-free N2B27 media. (right) Relative pERK1/2 levels (n=3). (I)

385 (left)Western blot of pERK1/2 and ERK1/2 in 3 $\mu$ M CHIR and increasing concentrations  
386 of PD in serum-free N2B27 media. (right) Relative pERK1/2 levels (n=6). All error bars  
387 in the figure represent s.e.m.

388

389 **Fig. 2. FGF autocrine signaling pathway components are essential for *Nanog***

390 **autoregulation.** (A) (left) Schematic depiction of Tamoxifen (OHT) inducible TNERT  
391 cell line. TNERT and TDiN (Fig. S2A, B) are similar to NERTc3 and 44iN(16), where  
392 the NANOG function is reinstated by 4-Hydroxytamoxifen (OHT) or Doxycycline  
393 respectively, and endogenous *Nanog* gene activity is reported by GFP. (Middle) FACS  
394 profile of TNERT treated with OHT (red) or no OHT (blue). (Right) *Nanog*:GFP  
395 population median of TNERT (n=3). (B) FACS profiles of TNERT, and TDiN treated  
396 with 2 $\mu$ M SU5402, with OHT/Doxycycline (red) or no OHT/Doxycycline (blue). (C)  
397 Heat map representing transcript levels (FPKM) of *Fgfbp1* from 8-cell to blastocyst stage  
398 analyzed from the single-cell sequencing data. (D) Schematic depiction of TNERTFgfr1-  
399 /-, TNERTFgfr2-/, TNERTFgf4-/-, and TNERTFgfbp1-/- cell lines, which are  
400 derivatives of TNERT where *Fgfr1*, *Fgfr2*, *Fgf4*, and *Fgfbp1* are knocked out  
401 respectively. (E) FACS profiles of TNERT, TNERTFgfr1-/-, TNERTFgfr2-/-,  
402 TNERTFgf4-/-, and TNERTFgfbp1-/- cells, treated with OHT (red) or no OHT (blue).  
403 All error bars in the figure represent s.e.m.

404

405 **Fig. 3. NANOG triggers autoregulation by inducing the expression of FGFR2,**  
406 **FGF4, and FGFBP1.**

407 (A) RT-qPCR showing relative transcript levels after 0, 0.5, 1, 2, 4, 8, 12 and 18 hrs  
408 OHT treatment in TNERT (n=3). *Esrrb*, a known direct target of NANOG was used as  
409 positive control. (B) RT-qPCR of relative levels of pre- mRNA at the above indicated  
410 time points after OHT treatment in TNERT (n=3). (C) ChIP analysis of NANOG on  
411 *Fgf4*, *Fgfbp1*, *Fgfr1*, *Fgfr2*, and *Nanog* genes in E14Tg2a cells cultured in SL or SLPD  
412 for 48 hrs (n=4). (D) ChIP analysis of NANOG on promoters of above-indicated loci in  
413 EDiN cells cultured in Doxycycline (red) or no Doxycycline (blue) for 48 hrs (n=3). (E)  
414 Western blot of FGFR1, FGFR2, and pERK1/2 in TNERT after 18 hrs treatment with or  
415 no OHT. (F) FACS analysis of FGFR2 on the cell surface of TNERT treated with (red)  
416 or no OHT (blue) (n=3). (G-H) ELISA-based relative quantification of FGF4 (G) and  
417 FGFBP1 (H) in conditioned media from TNERT treated with or no OHT (n=3). (I)  
418 Schematic of conditioned media experiment. (J) FACS analysis of T $\beta$ c44Cre6 cell line

419 in conditioned media collected from TNERT treated with OHT after 0, 18, 24, and 48  
420 hrs. (K) (left) FACS analysis of TNERTZfp281<sup>-/-</sup> cells treated with (red) or with no  
421 OHT (blue) treatment. (right) *Nanog*:GFP population median of TNERTZfp281<sup>-/-</sup>  
422 (n=3). (L) FACS analysis of T $\beta$ c44Cre6 cell line in conditioned media from,  
423 TNERT+OHT 0 hrs, TNERTFGF4<sup>-/-</sup>, T $\beta$ c44Cre6 48 hrs, E14Tg2a- FGF4-OE  
424 (overexpression) 48 hrs, TNERT+OHT 48 hrs and 50ng/ml FGF4. All error bars in the  
425 figure represent s.e.m.

426

427 **Fig. 4. NANOG induced FGFR2 triggers autoregulation predominately in the ES**  
428 **cell population with higher *Nanog* expression.** (A) (top) To analyze autoregulation in

429 *Nanog*-high and *Nanog*-low cells, we sorted the lowest and the highest 10% population  
430 of the TNERT expressing GFP and treated with OHT. FACS profile of TNERT, the  
431 position of the gates indicates the 10% low-*Nanog*:GFP (LN) and 10% high-*Nanog*:GFP  
432 (HN) population sorted for culture. (Bottom left) FACS profiles of LN and HN after 18

433 hrs culture in SL. LN (dark green), HN (dark maroon) in SL, and LN (light green), HN  
434 (light maroon) in SL+ OHT. (Bottom right) *Nanog*:GFP population median of TNERT  
435 (n=3). (B) FACS profile of E14Tg2a cultured in SL or SLPD for 48 hrs and co-  
436 immunostained with anti-NANOG and anti-FGFR1 or anti-FGFR2 antibodies. r-values

437 represent the average of 3 independent experiments (n=3). (C) (left) FACS profile of  
438 E14Tg2a immunostained with anti-NANOG and anti-FGFR2 antibody, the gates mark  
439 the 10% low-NANOG (LN) and 10% high-NANOG (HN) population. (right) Histogram  
440 depicting the FGFR2 expression profiles in the gated LN and HN cell population (n=3).

441 (D-E) Schematic representation of TNERTNBR1<sup>-/-</sup> (D) and TNERTNBR2<sup>-/-</sup> (E) cells,  
442 in which NANOG binding sequences at +1.4 kb (NBR1) and -0.2 kb (NBR2) are deleted  
443 respectively. (F) (Top) FACS profiles of TNERT, TNERTNBR1<sup>-/-</sup>, and TNERTNBR2<sup>-/-</sup>  
444 <sup>-/-</sup> with (red) or no OHT treatment (blue). (bottom) *Nanog*:GFP population median of

445 TNERT, TNERTNBR1<sup>-/-</sup> and TNERTNBR2<sup>-/-</sup> with or no OHT treatment. (G) A  
446 cartoon depicting *Nanog* autoregulation in *Nanog*-high cells. The *Nanog*-high cells  
447 secrete more FGF4 and FGFBP1. They contain higher levels of FGFR2 on the surface  
448 and are hence more sensitive to the FGF ligand triggering a stronger FGF signaling. The

449 increased pERK1/2 in these cells recruit NONO to the *Nanog* locus and represses *Nanog*  
450 transcription. The *Nanog*-low cells secrete very little FGF4 and FGFBP1 and present  
451 fewer FGFR2 on their surface and are less sensitive to FGF signaling. The pERK1/2  
452 levels in *Nanog*-low cells are insufficient to execute *Nanog* autoregulation. All error bars

453 in the figure represent s.e.m.



454

455 **Fig. 5. ERK1/2 interacts and recruits NONO to repress *Nanog* transcription.** (A)

456 Schematic of TNERTNono<sup>-/-</sup> cell line; a derivative of TNERT in which *Nono* is  
457 knocked-out. (B) FACS profile of TNERTNono<sup>-/-</sup> treated with or no OHT (n=3). (C)  
458 Western blot of pERK1/2 and ERK1/2 in TNERT and TNERTNono<sup>-/-</sup> cells treated with  
459 or no OHT (n=3). (D) Immunoprecipitation analysis showing interactions between  
460 ERK1/2 and NONO in the presence or absence of *Nanog* induction by Doxycycline in  
461 TDiN cells. (E) (left) Western blot of pERK1/2 and ERK1/2 in E14Tg2a cells treated  
462 with PD or FGF4. (right) Relative levels of pERK1/2 in E14Tg2a cells treated with PD  
463 or FGF4 (n=4). (F) Schematic representation of *Nanog* locus comprising the -6.0 to +2kb  
464 region. The vertical bars represent relative positions of primer pairs used for ChiP-qPCR  
465 analysis. S1-S6 are located upstream of the TSS, S7 primer pair is located around TSS,  
466 S8 and S9 are located downstream in the first intron. (G-K) ChIP-qPCR analysis of  
467 pERK1/2 (G), NONO (H), Pol2 (I), H3K4me3 (J) and H3K27me3 (K) on *Nanog* 5'  
468 region in E14Tg2a cells (blue), treated with FGF4 (green) and with PD (pink) (n=3). (L)  
469 Cycloheximide chase assay of NANOG in SL, SLPD, and SLFGF4 in E14Tg2a cells.  
470 (M) A cartoon illustrating the repression of *Nanog* by FGF signaling and derepression  
471 of *Nanog* in absence of FGF signaling. The FGF4 activates the FGF signaling cascade,  
472 resulting in phosphorylation of ERK1/2. pERK1/2 interacts and recruits NONO to the  
473 *Nanog* promoter and represses transcription of *Nanog*. pERK1/2 also affects the stability  
474 of the NANOG. In absence of FGF4, the pERK1/2 levels decrease resulting in enhanced  
475 stability of NANOG and transcription of *Nanog* locus by NANOG and other  
476 pluripotency factors resulting in derepression of *Nanog* locus. All error bars represent  
477 s.e.m.

478

479 **Fig. 6. NANOG regulates ERK signaling dynamics and heterogeneity**

480 (A) Immunofluorescence of pERK1/2 (red) and NANOG (green) in the indicated ESCs.  
481 (B) The normalized fluorescence intensity of pERK1/2 was plotted against the  
482 normalized fluorescent intensity of NANOG. (C) Contour plot of FACS analysis of  
483 pERK1/2 and NANOG in 10% NANOG-high NiRFP2A cells cultured for the indicated  
484 time. (D) A plot of median fluorescence intensity of pERK1/2 and NANOG relative to  
485 0 hrs culture of 10% NANOG-high NiRFP2A cells. The NANOG and pERK1/2  
486 expression oscillate between high and low levels in the cells during the course of culture.  
487 (E) A working model of the NANOG-pERK1/2 reciprocal regulatory loop operating in  
488 ESCs. NANOG induces *Fgfbp1* and *Fgfr2* to enhance ERK signaling in *Nanog*-high

489 cells. pERK1/2 along with NONO occupy the *Nanog* promoter to repress its  
490 transcription. The transcription repression results in reduced NANOG, which prevents  
491 induction of *Fgfbp1* and *Fgfr2*. This reduces ERK activity relieving the repression on  
492 the *Nanog* promoter. (F) A schematic depicting the progression of cells through different  
493 expression states of NANOG and pERK1/2 expression in the ESC population. The cells  
494 expressing high-NANOG induce *Fgfbp1* and *Fgfr2* to activate pERK by autocrine  
495 signaling to give rise to a high-NANOG:high-pERK state. The repression of *Nanog*  
496 transcription by pERK leads the cells through different intermediate levels of expression  
497 of NANOG and pERK resulting in a low-NANOG:low-pERK state. The low pERK  
498 permits transcription of *Nanog* and gradual induction of *Fgfbp1* and *Fgfr2* by NANOG  
499 culminating in a high-NANOG:high-pERK state. The cells will cycle through different  
500 levels of pERK and NANOG levels generating a heterogeneous population with a strong  
501 correlation between pERK and NANOG in an ESC cells culture.

502

### 503 **Methods:**

504 **Cell Culture:** The cell lines used in this study and their origin is depicted in Fig. S7. All  
505 the cells used in this study are derivatives of E14Tg2a ES. The cells were cultured as  
506 described earlier (2). 4-Hydroxytamoxifen (4-OHT), Doxycycline, and Cycloheximide  
507 were used at a concentration of 1  $\mu$ g/ml, 1  $\mu$ g/ml, and 100  $\mu$ g/ml respectively. The TNERT  
508 and its derivative cell lines were treated with 4-OHT for 18 hrs except when indicated.  
509 TDiN and EDiN were treated with Doxycycline for 48 hrs unless indicated. CHIR99021  
510 (CHIR, PD0325901 (PD)), and SU5402 were used at 3  $\mu$ M, 1  $\mu$ M, and 2  $\mu$ M, respectively,  
511 except when indicated. FGF4 and FGFBP1 were used at 50ng/ml concentration. The cells  
512 were cultured in Serum+ LIF (SL), SL+ PD (SLPD), SL+CHIR (SLCHIR), SL+SU5402  
513 (SLSU5402), SL + PD +CHIR (SL2i) and N2B27+LIF+PD+CHIR (2iL) for at least 2  
514 passages before treating with either 4-OHT or Doxycycline.

515 The cells were cultured on cell culture dishes coated with 0.1% gelatin for all  
516 experiments. The conditioned media from the cells was collected after the specific  
517 treatments or indicated time points. The conditioned media was passed through a 0.22  
518  $\mu$ M filter and added to T $\beta$ c44Cre6 or TNERT cells. The cells were cultured in the  
519 conditioned media for 24 hrs before FACS analysis.

520

521 **Generation of Knock-out cell lines using paired CRISPR constructs:** pU6-iRFP  
522 (pU6-Cas9-T2A-iRFP-2A-PuroR) construct was engineered by replacing mCherry

523 coding sequence with iRFP670-2A-PuroR cassette in pU6-(BbsI)-CBh-Cas9-T2A-  
524 mCherry plasmid (Addgene 64324) by Gibson assembly. For generating knock-out of a  
525 gene, two sgRNAs were designed with the expected cutting sites at least 30 bps apart to  
526 achieve deletion of at least 30 bps or more. For genotyping of the deletions, a set of  
527 genotyping primers was designed outside the deletion region flanking the sgRNA pair.  
528 The sgRNAs were designed using the UCSC genome browser and Deskgen or  
529 Benchling. The sequences of the sgRNAs and the genotyping primers are detailed in  
530 Table S1. All sgRNAs were cloned into pU6-Cas9-T2A-iRFP-2A-PuroR plasmids. To  
531 generate a paired sgRNA construct, the U6-SgRNA cassette from one plasmid  
532 containing the sgRNA was amplified and Gibson assembled into the XbaI site of the  
533 plasmid containing the other sgRNA pair of the pair. Around 1 µg of paired sgRNA  
534 CRISPR plasmid was nucleofected in 1 million cells. The transfected cells were sorted  
535 by FACS for iRFP expression and cultured to obtain clones. The clones were genotyped  
536 by PCR using respective primer sets to identify the heterozygous and homozygous  
537 clones. The sequence of the derivation of cell lines is described in Fig. S7.

538

539 **Generation of Knock-in cell lines:** A sgRNA encompassing the stop codon of *Nanog*  
540 was cloned into pU6-iRFP and co-transfected with the targeting vectors. The 2A-mCherry  
541 cassette was replaced with iRFP sequences by Gibson assembly in Nanog-2A-mCherry  
542 targeting vector (Addgene 59995) to generate Nanog iRFP670 fusion targeting vector.  
543 Around 3 µg plasmid (targeting vector and CRISPR plasmid) were nucleofected in 3  
544 million E14Tg2a cells. The cells were selected against G418. The derivation of cell lines  
545 is described in Fig. S7.

546

547 **Real-time PCR analysis:** The RNA was extracted with TRIZOL reagent and quantified  
548 using a Nanodrop2000 spectrophotometer (Thermo Fisher Scientific). One microgram of  
549 total RNA was reversed transcribed into cDNA by using superscript III. All real-time PCR  
550 was carried out with Power SYBR Green PCR master mix on the ABI prism 7900 HT  
551 sequence detection system (ABI) as per the manufacturer's instructions. GAPDH was  
552 used as an internal control or normalizer. The data was analyzed by SDS 2.2 software  
553 provided with the instrument. The primers used for real-time PCR are given in Table S1.

554

555 **Western blot analysis:** The cells were harvested by using RIPA buffer with 25mM Tris  
556 HCl (pH 8.0), 150mM NaCl, 1%NP-40, 0.5% Sodium deoxycholate, 0.1% SDS and  
557 Complete Protease Inhibitor Cocktail Tablets (Roche). The protein samples were

558 resolved by 4-20% gradient SDS-PAGE and electroblotted on to polyvinylidene  
559 difluoride (PVDF) membrane. The blot was blocked with 3% Blotto for an hour and  
560 incubated overnight with a primary antibody at 4°C. Blots were washed thrice with TBST  
561 and hybridized with secondary antibody and the blots were visualized using enhanced  
562 chemiluminescence (ECL) detection kit. Western blot quantifications were performed  
563 using Image lab (Bio-rad).

564

565 **Chromatin Immunoprecipitation (ChIP):** Cells were fixed by adding 270  $\mu$ L of 37%  
566 formaldehyde into 10 ml of media and incubated for 10 minutes at 37°C to crosslink the  
567 chromatin. Cells were washed twice with cold PBS containing protease inhibitors. Cells  
568 were scraped and harvested by centrifugation. The cell pellet was dissolved in 200  $\mu$ L of  
569 SDS Lysis Buffer (1% SDS, 10 mM EDTA, and 50 mM Tris, pH 8.0) containing protease  
570 inhibitors (per  $10^6$  cells) and incubated on ice for 10 min. The 25 cycles of sonication  
571 were used to shear DNA between 200 to 1000 base pairs. The sample was centrifuged at  
572 13,000 rpm for 10 min (at 4°C). The supernatant was diluted by adding 1800  $\mu$ l ChIP  
573 Dilution Buffer (1.1% Triton X-100, 1.2 mM EDTA, 16.7 mM Tris-HCl, pH 8.0, 167  
574 mM NaCl with protease inhibitors). The 1% input was aliquoted from the supernatant. To  
575 reduce nonspecific background, diluted cell supernatant was preabsorbed for one hour at  
576 4°C with protein A/G magnetic beads (Invitrogen). The supernatant fraction was  
577 incubated overnight at 4°C with an appropriate antibody and protein A/G magnetic beads  
578 were blocked with 4% BSA, 2  $\mu$ g salmon sperm DNA. The next day, pre-blocked beads  
579 were mixed with the sample and incubated for 1 hour to capture the antibodies. The  
580 supernatant was discarded and washed in the given order with 1 mL of each of the buffers  
581 - Low Salt Wash Buffer (0.1% SDS, 1% Triton X-100, 2 mM EDTA, 20 mM Tris-HCl,  
582 pH 8.0, 150 mM NaCl), High Salt Wash Buffer (0.1% SDS, 1% Triton X-100, 2 mM  
583 EDTA, 20 mM Tris-HCl, pH 8.0, 500 mM NaCl), LiCl Wash Buffer (0.25 M LiCl, 1%  
584 IGEPAL-CA630, 1% deoxycholic acid, 1 mM EDTA, 10 mM Tris, pH 8.0.), and TE  
585 buffer. DNA was eluted with elution buffer (1% SDS, 0.1M NaHCO<sub>3</sub>). The sample input  
586 and the ChIP chromatin were reverse crosslinked with 20  $\mu$ L of 5 M NaCl by heating at  
587 65°C for 4 hours. Followed by one hour at 45°C with 10  $\mu$ L of 0.5 M EDTA, 20  $\mu$ L 1 M  
588 Tris- HCl, pH 6.5, and 2  $\mu$ L of 10 mg/mL Proteinase K. Finally, DNA was eluted in 50  
589  $\mu$ L water using a minEleute PCR purification kit. Then 1  $\mu$ L of sample and input was used  
590 for qPCR analysis. The primers used for qPCR analysis were listed in Table S1.

591

592 **Co-Immunoprecipitation in ES cells:** 10-12 million ES cells were harvested by

593 trypsinization, washed twice with cold PBS, and resuspended in 800  $\mu$ l of CoIP Lysis  
594 Buffer (50 mM Tris-HCl, pH 6.75; 350 mM NaCl, 0.7% NP40, EDTA 0.1mM, 20%  
595 (v/v) glycerol, and protease inhibitor cocktail). The cell lysate was mixed with protein  
596 A/G magnetic beads for 1 hour at 4°C for pre-clearing the background. Then 5% input  
597 was aliquoted and the remaining supernatant was incubated overnight with appropriate  
598 primary antibody. The protein A/G magnetic beads were blocked overnight at 4°C with  
599 200  $\mu$ l of CoIP Lysis buffer containing 4% BSA. The next day, the beads were  
600 transferred to the primary antibody incubated tubes and incubated for one hour at 4°C.  
601 The bead was washed three times with ice-cold TBS150 (50mM Tris, 150mM NaCl) and  
602 the protein was eluted with 2X sample buffer (125 mM Tris-HCl, pH 6.8, 4% SDS, 20%  
603 (v/v) glycerol, 0.004% bromophenol blue), by boiling for 5 min. The western was done  
604 for sample and input and the interaction was analyzed.

605

606 **Immunocytochemistry:** The cells were cultured in 24 well dishes and fixed in 3.7%  
607 formaldehyde diluted in PBS for 15 mins at RT. After 3 washes with PBS, the cells were  
608 permeabilized and blocked with PBS containing 0.5% BSA and 0.3% Triton-X100 for 1  
609 hour at room temperature. The cells were hybridized with primary antibody (1:100  
610 dilution) in PBS containing 0.5% BSA at 4°C overnight in a humidified chamber. The  
611 cells were washed three times with PBS and hybridized to appropriate secondary  
612 antibody at 1:1000 dilution room temperature for 1hour. The nuclei were stained with  
613 DAPI in 1X PBS for 20 min at room temperature. The cells were washed thrice with  
614 PBS. The cells were layered with 100  $\mu$ l of the mixture of PBS and Glycerol (1:1) and  
615 the images were acquired on the ZEISS Axio observer microscope and analyzed using  
616 ImageJ software.

617

618 **ELISA Assay:** The condition media from the cell lines was collected at the respective  
619 time points. 100  $\mu$ l of the media was coated per well of 96 wells of ELISA plate by  
620 incubating overnight at 4°C. The wells were washed thrice with PBS containing 0.05%  
621 Tween-20 and blocked with PBS containing 2% BSA for one hour at room temperature.  
622 The wells were washed once with PBS and incubated with the appropriate primary  
623 antibody (1:100) for one hour. Washed thrice with PBST, an appropriate HRP-labeled  
624 secondary antibody was hybridized for one hour at room temperature. The wells were  
625 washed thrice with PBST and incubated in substrate solution OPD (o-phenylenediamine  
626 dihydrochloride) 3mg/ml with 6  $\mu$ l/ml H<sub>2</sub>O<sub>2</sub>) for 30 min in dark. The reaction was stopped  
627 by using 2N H<sub>2</sub>SO<sub>4</sub>. The absorbance was measured at 492 nm in Power wave XS2 (Bio



628 Tek instruments).

629

### 630 **FACS analysis:**

631 **Reporter cells:** Cells were trypsinized and collected by spinning at 800 rpm for 5 min.  
632 The media was removed and cells were resuspended in 300  $\mu$ l of PBS containing 2%  
633 FBS at  $10^6$  cells/ml. The samples were analyzed in the Gallios flow cytometer (Beckman  
634 Coulter) or Fortessa flow cytometer (BD Biosciences). Sorting was performed on a  
635 MoFlo-XDP cell sorter (Beckman Coulter).

636 **Immunostained cells:** Cells were harvested by treatment with 0.5 mM EDTA and  
637 resuspended into single cells. The cells were fixed in PBS with 4% paraformaldehyde  
638 (PFA) for 20 min at room temperature. Cells were washed twice with cold PBS and  
639 incubated with methanol for 30 min for permeabilization. In the case of experiments  
640 involving the analysis of FGFRs on the cell surface, the permeabilization step was  
641 excluded. Then cells were blocked with PBS containing 0.5% BSA for 60 min at room  
642 temperature. The cells were washed and hybridized to the appropriate primary antibody  
643 at 4°C overnight. The cells were washed thrice with PBS and hybridized to the  
644 appropriate secondary antibody in PBS containing 0.5% BSA at 1:1000 dilution for one  
645 hour at room temperature. The cells were washed thrice with PBS and the fluorescence  
646 profiles were acquired in the Gallios FACS analyzer (Beckman Coulter). All the FACS  
647 data were analyzed using FlowJo software (BD Biosciences).

648

649 **Statistical analysis and reproducibility:** Statistical analysis was done by using a two-  
650 tailed paired or unpaired student t-test. The representation of data is in the form of  
651 means $\pm$ SEM. The mean was calculated for more than three independent experiments *P*  
652 value $<0.05$  is considered as statistically significant. \* represents  $P<0.05$ , \*\* represents  
653  $P<0.001$ , \*\*\* represents  $P<0.0001$ , and \*\*\*\* represents  $P<0.00001$ .

654

### 655 **References**

656

- 657 1. I. Chambers *et al.*, Nanog safeguards pluripotency and mediates germline  
658 development. **450**, 1230-1234 (2007).
- 659 2. N. Festuccia *et al.*, Esrrb is a direct Nanog target gene that can substitute for Nanog  
660 function in pluripotent cells. **11**, 477-490 (2012).
- 661 3. A. Filipczyk *et al.*, Biallelic expression of nanog protein in mouse embryonic stem  
662 cells. **13**, 12-13 (2013).
- 663 4. K. Hayashi, S. M. C. de Sousa Lopes, F. Tang, M. A. J. C. s. c. Surani, Dynamic  
664 equilibrium and heterogeneity of mouse pluripotent stem cells with distinct

- 665 functional and epigenetic states. **3**, 391-401 (2008).
- 666 5. T. Kalmar *et al.*, Regulated fluctuations in nanog expression mediate cell fate  
667 decisions in embryonic stem cells. **7**, e1000149 (2009).
- 668 6. H. Niwa, K. Ogawa, D. Shimosato, K. J. N. Adachi, A parallel circuit of LIF  
669 signalling pathways maintains pluripotency of mouse ES cells. **460**, 118-122  
670 (2009).
- 671 7. M.-E. Torres-Padilla, I. J. D. Chambers, Transcription factor heterogeneity in  
672 pluripotent stem cells: a stochastic advantage. **141**, 2173-2181 (2014).
- 673 8. Y. Toyooka, D. Shimosato, K. Murakami, K. Takahashi, H. J. D. Niwa,  
674 Identification and characterization of subpopulations in undifferentiated ES cell  
675 culture. **135**, 909-918 (2008).
- 676 9. D. L. van den Berg *et al.*, Estrogen-related receptor beta interacts with Oct4 to  
677 positively regulate Nanog gene expression. **28**, 5986-5995 (2008).
- 678 10. I. Chambers *et al.*, Functional expression cloning of Nanog, a pluripotency  
679 sustaining factor in embryonic stem cells. **113**, 643-655 (2003).
- 680 11. K. Mitsui *et al.*, The homeoprotein Nanog is required for maintenance of  
681 pluripotency in mouse epiblast and ES cells. **113**, 631-642 (2003).
- 682 12. Y. Miyanari, M.-E. J. N. Torres-Padilla, Control of ground-state pluripotency by  
683 allelic regulation of Nanog. **483**, 470-473 (2012).
- 684 13. M. Fidalgo *et al.*, Zfp281 mediates Nanog autorepression through recruitment of  
685 the NuRD complex and inhibits somatic cell reprogramming. **109**, 16202-16207  
686 (2012).
- 687 14. M. Fidalgo *et al.*, Zfp281 functions as a transcriptional repressor for pluripotency  
688 of mouse embryonic stem cells. **29**, 1705-1716 (2011).
- 689 15. S. Mora-Castilla *et al.*, Nitric oxide repression of Nanog promotes mouse  
690 embryonic stem cell differentiation. **17**, 1025-1033 (2010).
- 691 16. P. Navarro *et al.*, OCT4/SOX2-independent Nanog autorepression modulates  
692 heterogeneous Nanog gene expression in mouse ES cells. **31**, 4547-4562 (2012).
- 693 17. L. Pereira, F. Yi, B. J. J. M. Merrill, c. biology, Repression of Nanog gene  
694 transcription by Tcf3 limits embryonic stem cell self-renewal. **26**, 7479-7491  
695 (2006).
- 696 18. T. Hamazaki, S. M. Kehoe, T. Nakano, N. J. M. Terada, c. biology, The Grb2/Mek  
697 pathway represses Nanog in murine embryonic stem cells. **26**, 7539-7549 (2006).
- 698 19. S.-H. Kim *et al.*, ERK1 phosphorylates Nanog to regulate protein stability and  
699 stem cell self-renewal. **13**, 1-11 (2014).
- 700 20. D. A. Faddah *et al.*, Single-cell analysis reveals that expression of nanog is  
701 biallelic and equally variable as that of other pluripotency factors in mouse ESCs.  
702 **13**, 23-29 (2013).
- 703 21. M.-S. Yun, S.-E. Kim, S. H. Jeon, J.-S. Lee, K.-Y. J. J. o. c. s. Choi, Both ERK  
704 and Wnt/ $\beta$ -catenin pathways are involved in Wnt3a-induced proliferation. **118**,  
705 313-322 (2005).
- 706 22. T. Kunath *et al.*, FGF stimulation of the Erk1/2 signalling cascade triggers  
707 transition of pluripotent embryonic stem cells from self-renewal to lineage  
708 commitment. **134**, 2895-2902 (2007).
- 709 23. F. Lanner, J. J. D. Rossant, The role of FGF/Erk signaling in pluripotent cells. **137**,  
710 3351-3360 (2010).
- 711 24. M. Kang, V. Garg, A.-K. J. D. c. Hadjantonakis, Lineage establishment and  
712 progression within the inner cell mass of the mouse blastocyst requires FGFR1  
713 and FGFR2. **41**, 496-510. e495 (2017).
- 714 25. A. Molotkov, P. Mazot, J. R. Brewer, R. M. Cinalli, P. J. D. c. Soriano, Distinct  
715 requirements for FGFR1 and FGFR2 in primitive endoderm development and exit  
716 from pluripotency. **41**, 511-526. e514 (2017).

- 717 26. S.-J. Park, K. Shirahige, M. Ohsugi, K. J. N. a. r. Nakai, DBTMEE: a database of  
718 transcriptome in mouse early embryos. **43**, D771-D776 (2015).
- 719 27. E. Tassi *et al.*, Enhancement of fibroblast growth factor (FGF) activity by an FGF-  
720 binding protein. **276**, 40247-40253 (2001).
- 721 28. V. Karwacki-Neisius *et al.*, Reduced Oct4 expression directs a robust pluripotent  
722 state with distinct signaling activity and increased enhancer occupancy by Oct4  
723 and Nanog. **12**, 531-545 (2013).
- 724 29. D. M. Ornitz *et al.*, Receptor specificity of the fibroblast growth factor family.  
725 **271**, 15292-15297 (1996).
- 726 30. X. Zhang *et al.*, Receptor specificity of the fibroblast growth factor family: the  
727 complete mammalian FGF family. **281**, 15694-15700 (2006).
- 728 31. G. Auciello, D. L. Cunningham, T. Tatar, J. K. Heath, J. Z. J. J. o. c. s. Rappoport,  
729 Regulation of fibroblast growth factor receptor signalling and trafficking by Src  
730 and Eps8. **126**, 613-624 (2013).
- 731 32. C. Francavilla *et al.*, Functional proteomics defines the molecular switch  
732 underlying FGF receptor trafficking and cellular outputs. **51**, 707-722 (2013).
- 733 33. S. Frankenberg *et al.*, Primitive endoderm differentiates via a three-step  
734 mechanism involving Nanog and RTK signaling. **21**, 1005-1013 (2011).
- 735 34. D. M. Messerschmidt, R. J. D. b. Kemler, Nanog is required for primitive  
736 endoderm formation through a non-cell autonomous mechanism. **344**, 129-137  
737 (2010).
- 738 35. K. E. Santostefano, T. Hamazaki, C. E. Pardo, M. P. Klade, N. J. J. o. B. C.  
739 Terada, Fibroblast growth factor receptor 2 homodimerization rapidly reduces  
740 transcription of the pluripotency gene Nanog without dissociation of activating  
741 transcription factors. **287**, 30507-30517 (2012).
- 742 36. J. Nichols, J. Silva, M. Roode, A. J. D. Smith, Suppression of Erk signalling  
743 promotes ground state pluripotency in the mouse embryo. **136**, 3215-3222 (2009).
- 744 37. J. Wray, T. Kalkan, A. G. J. B. S. T. Smith, The ground state of pluripotency. **38**,  
745 1027-1032 (2010).
- 746 38. O. R. Davies *et al.*, Tcf15 primes pluripotent cells for differentiation. *Cell reports*  
747 **3**, 472-484 (2013).
- 748 39. C. Ma *et al.*, Nono, a bivalent domain factor, regulates Erk signaling and mouse  
749 embryonic stem cell pluripotency. **17**, 997-1007 (2016).
- 750 40. W.-W. Tee, S. S. Shen, O. Oksuz, V. Narendra, D. J. C. Reinberg, Erk1/2 activity  
751 promotes chromatin features and RNAPII phosphorylation at developmental  
752 promoters in mouse ESCs. **156**, 678-690 (2014).
- 753 41. X. Chen *et al.*, Integration of external signaling pathways with the core  
754 transcriptional network in embryonic stem cells. **133**, 1106-1117 (2008).
- 755 42. Y.-H. Loh *et al.*, The Oct4 and Nanog transcription network regulates pluripotency  
756 in mouse embryonic stem cells. **38**, 431-440 (2006).
- 757 43. J. Brumbaugh *et al.*, NANOG is multiply phosphorylated and directly modified  
758 by ERK2 and CDK1 in vitro. **2**, 18-25 (2014).
- 759 44. J. Jin *et al.*, The deubiquitinase USP21 maintains the stemness of mouse  
760 embryonic stem cells via stabilization of Nanog. **7**, 1-15 (2016).
- 761 45. M. J. Pokrass *et al.*, Cell-cycle-dependent ERK signaling dynamics direct fate  
762 specification in the mammalian preimplantation embryo. **55**, 328-340. e325  
763 (2020).
- 764 46. J. Deathridge, V. Antolović, M. Parsons, J. R. Chubb, Live imaging of ERK  
765 signalling dynamics in differentiating mouse embryonic stem cells. *Development*  
766 **146**, dev172940 (2019).
- 767 47. S. Bessonard *et al.*, Gata6, Nanog and Erk signaling control cell fate in the inner  
768 cell mass through a tristable regulatory network. **141**, 3637-3648 (2014).

- 769 48. C. S. Simon, S. Rahman, D. Raina, C. Schröter, A.-K. J. D. C. Hadjantonakis, Live  
770 Visualization of ERK Activity in the Mouse Blastocyst Reveals Lineage-Specific  
771 Signaling Dynamics. **55**, 341-353. e345 (2020).
- 772 49. M. V. Galanternik, K. L. Kramer, T. J. C. r. Piotrowski, Heparan sulfate  
773 proteoglycans regulate Fgf signaling and cell polarity during collective cell  
774 migration. **10**, 414-428 (2015).
- 775 50. K. Song *et al.*, API5 confers cancer stem cell-like properties through the FGF2-  
776 NANOG axis. *Oncogenesis* **6**, e285-e285 (2017).
- 777 51. C. Huang *et al.*, ERK1/2-Nanog signaling pathway enhances CD44 (+) cancer  
778 stem-like cell phenotypes and epithelial-to-mesenchymal transition in head and  
779 neck squamous cell carcinomas. *Cell death & disease* **11**, 1-14 (2020).
- 780
- 781

**Figure 1**

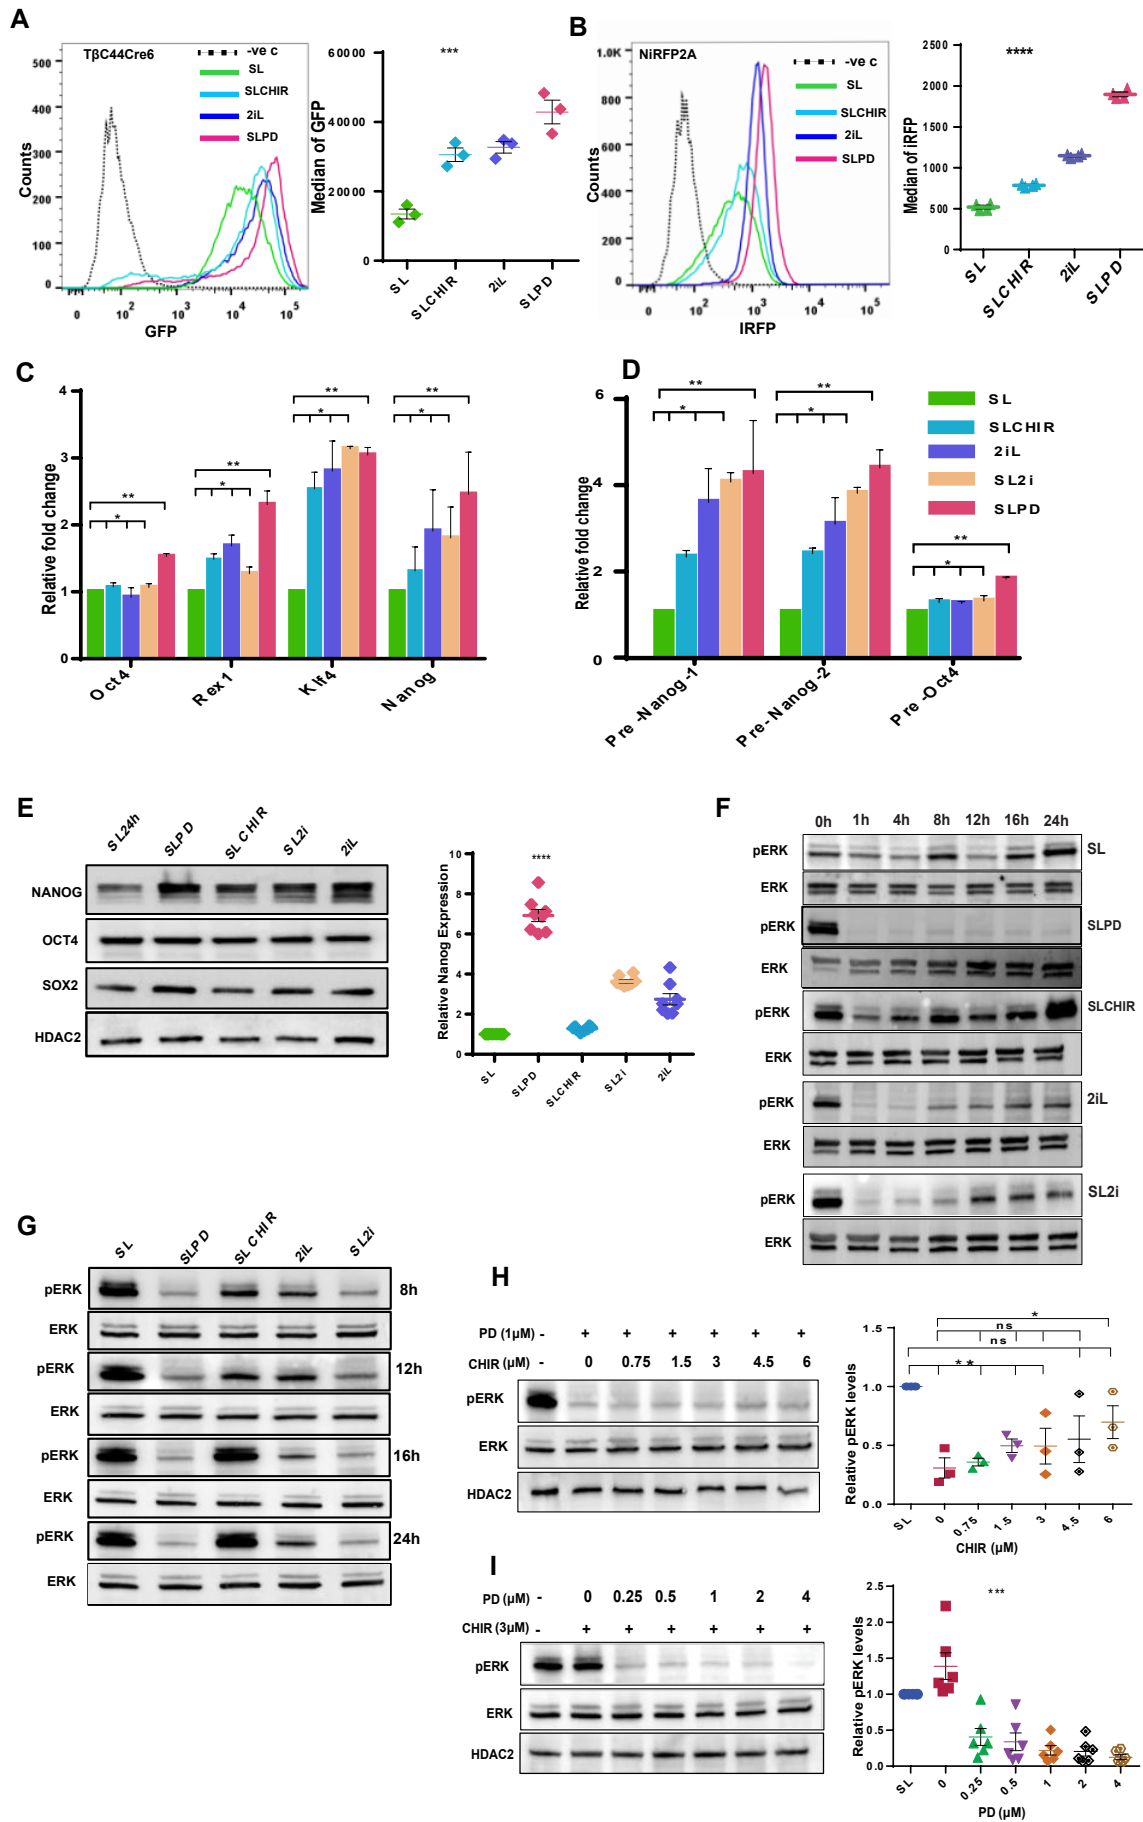



**Figure 2**

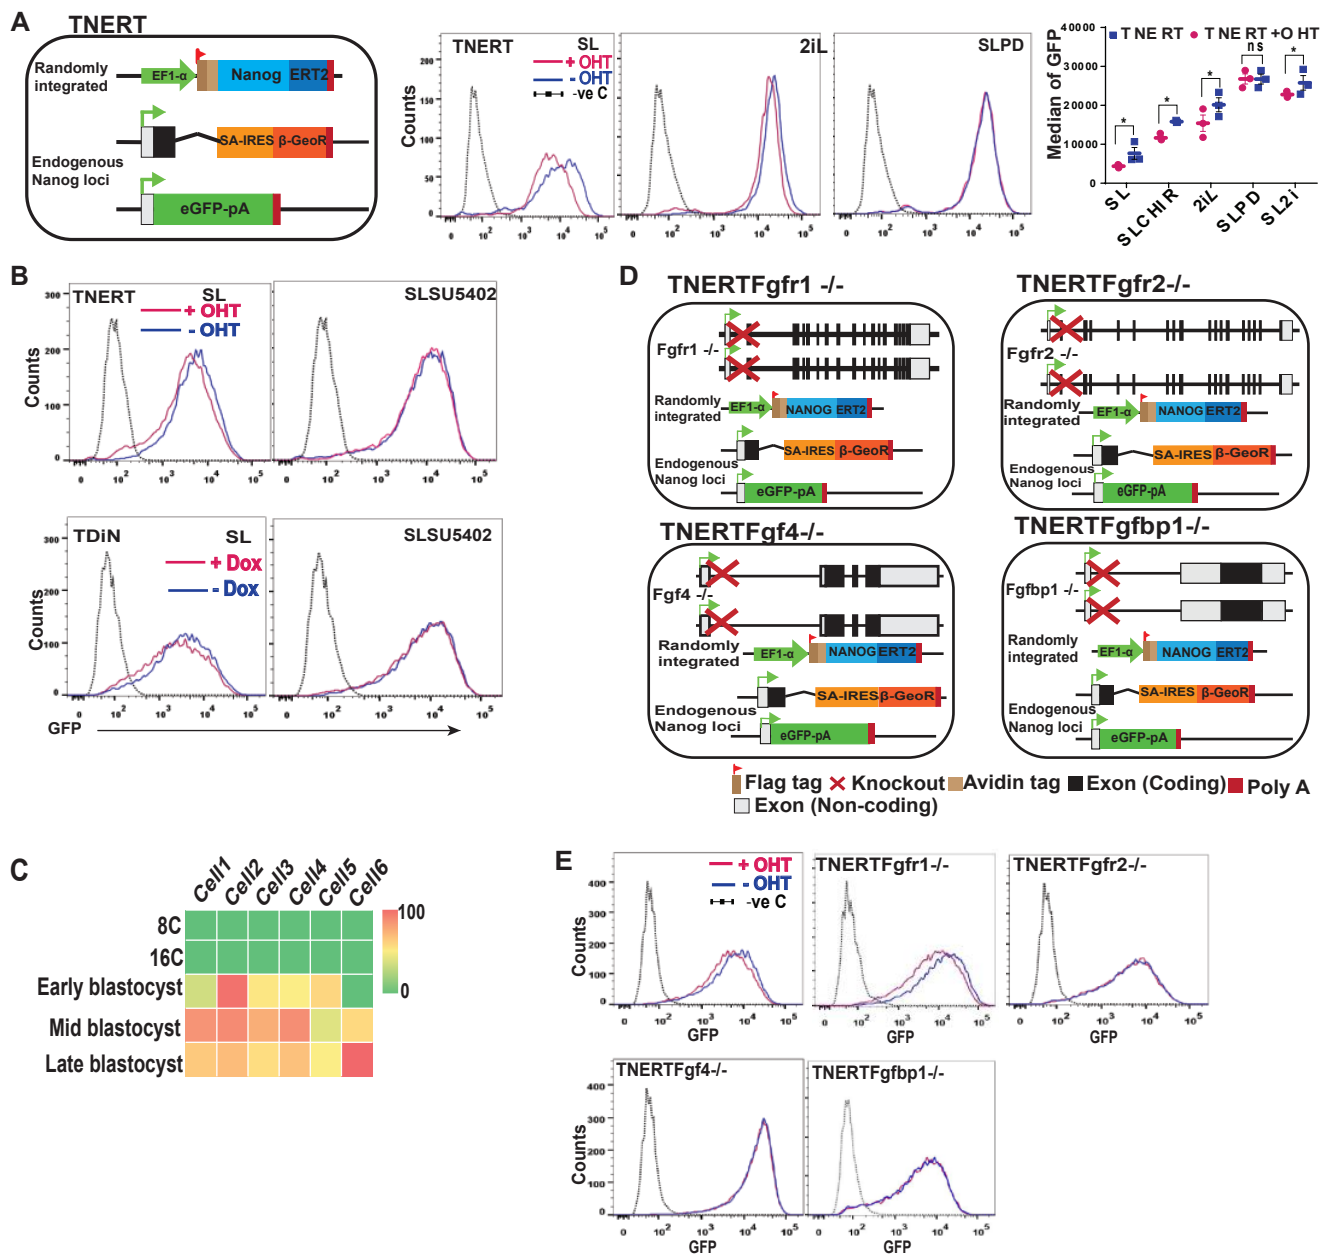

**Figure 3**

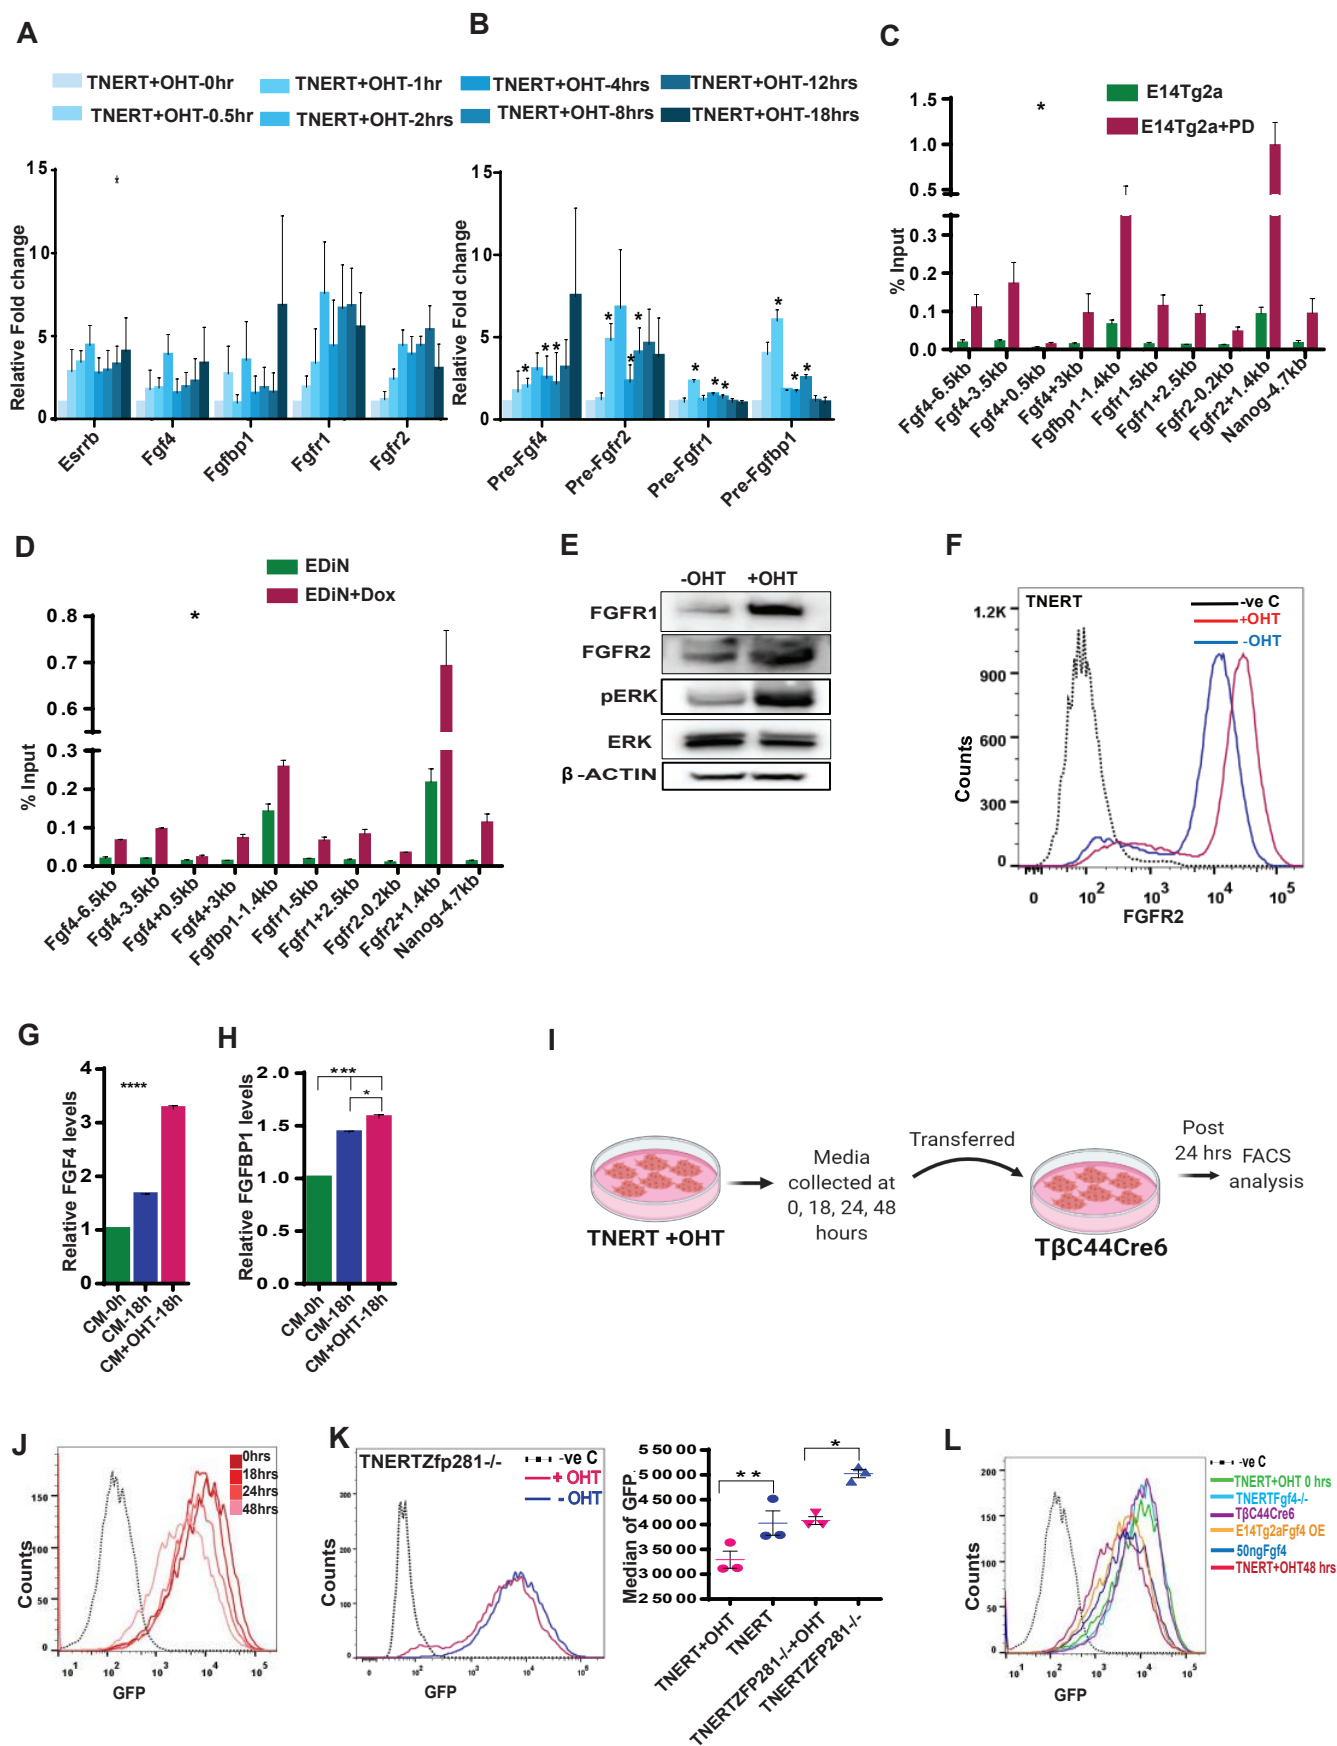

**Figure 4**

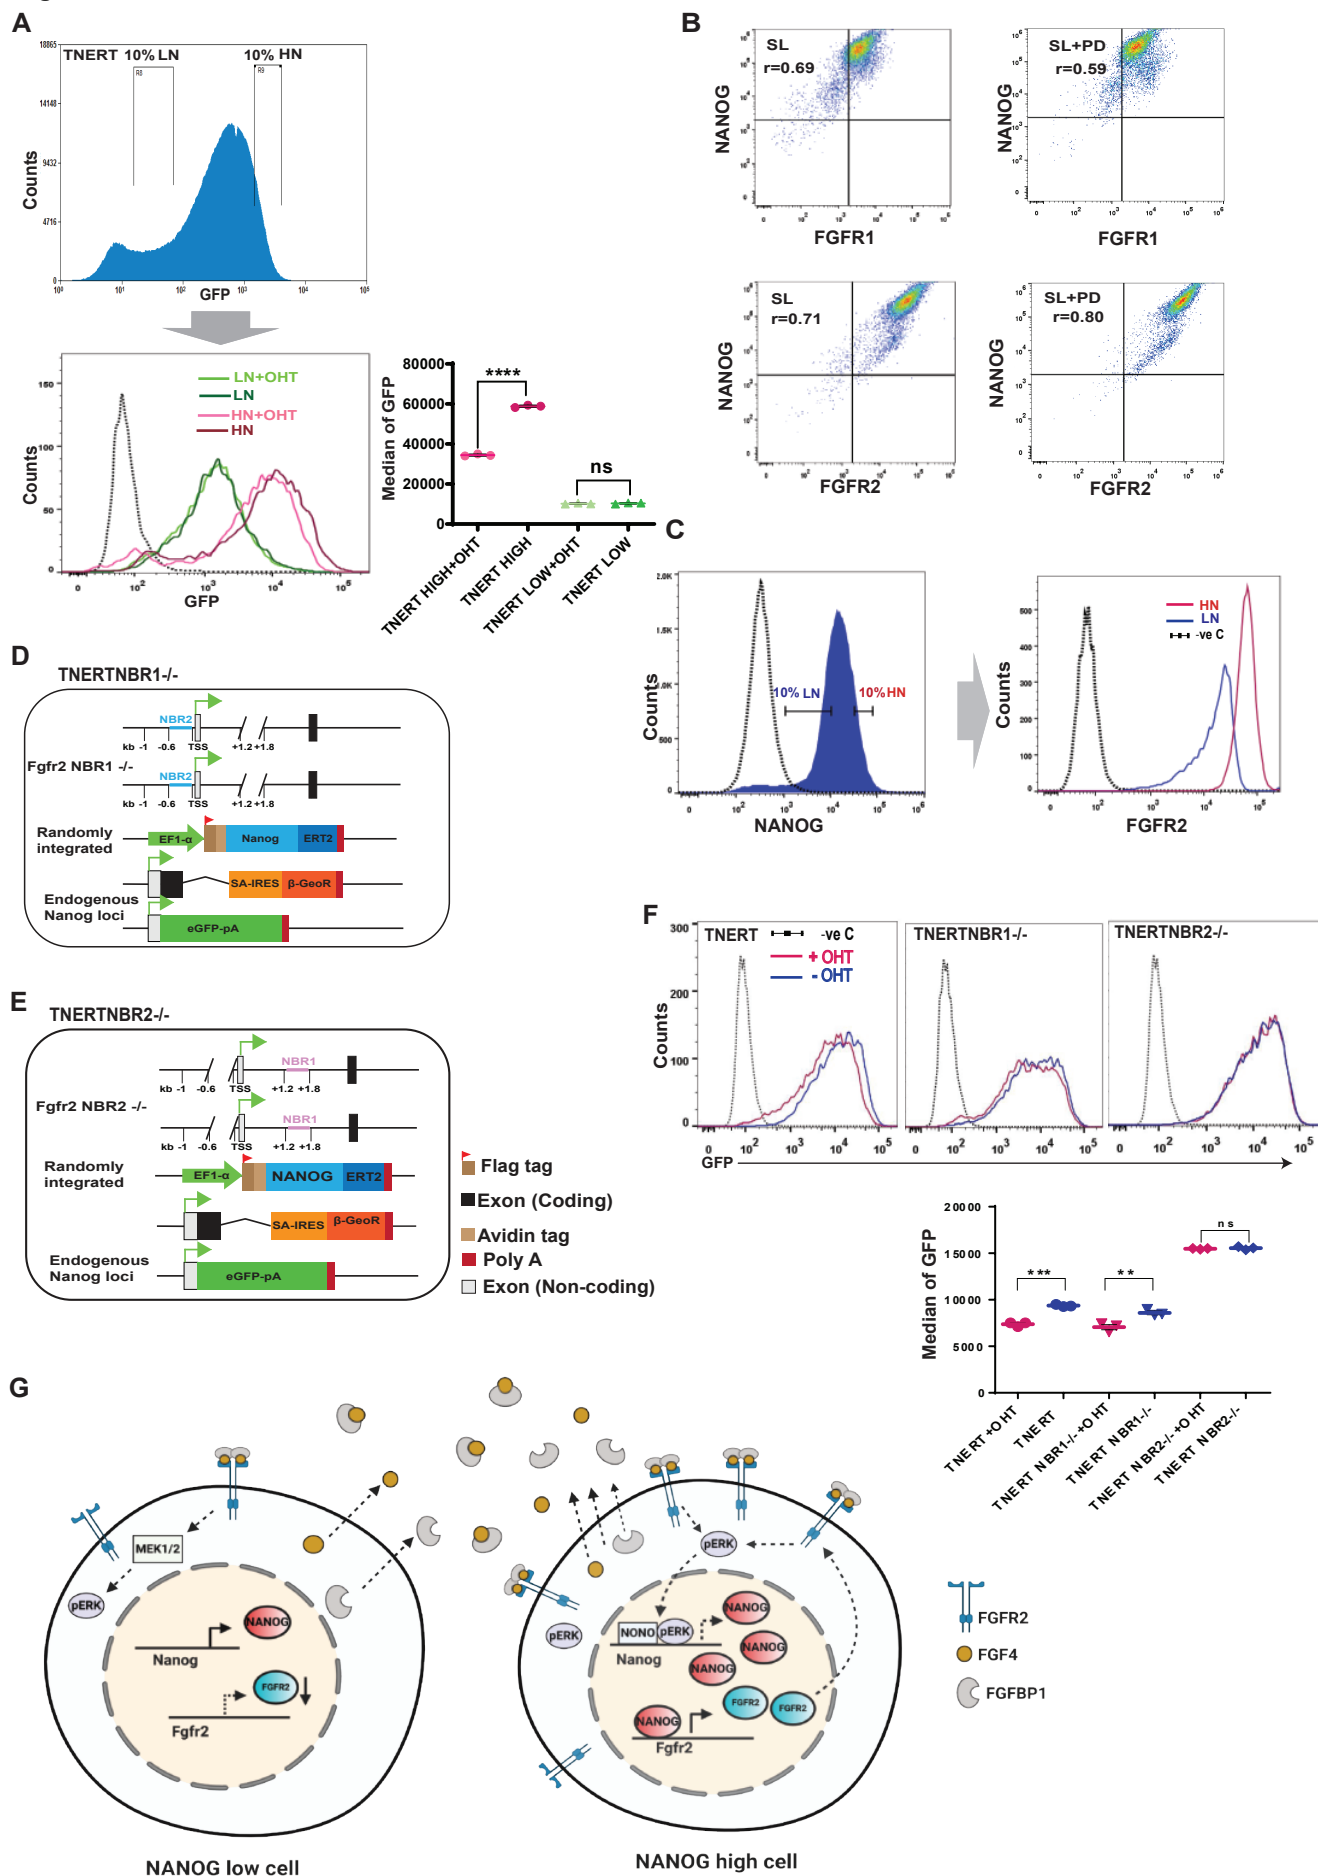

## Figure 5

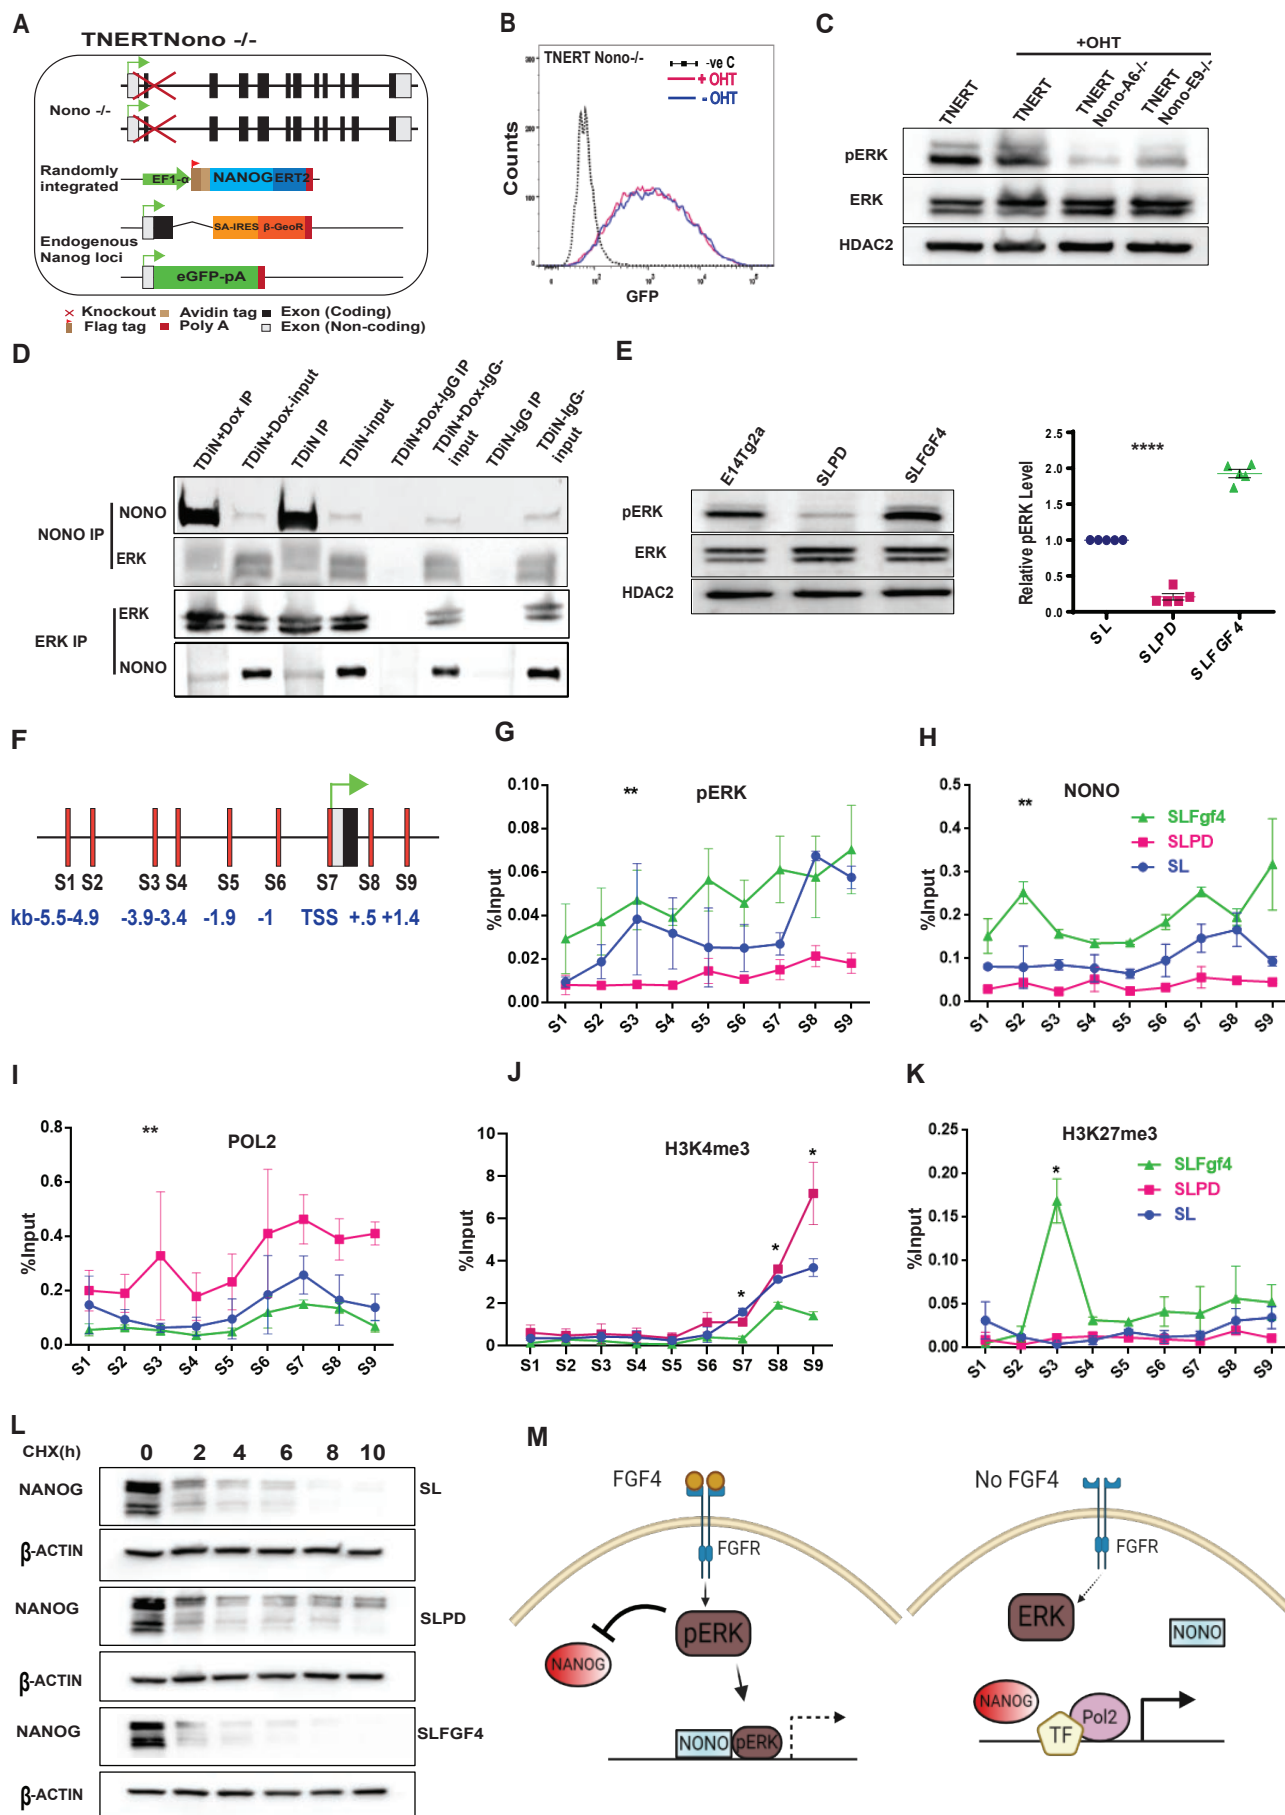

**Figure 6**

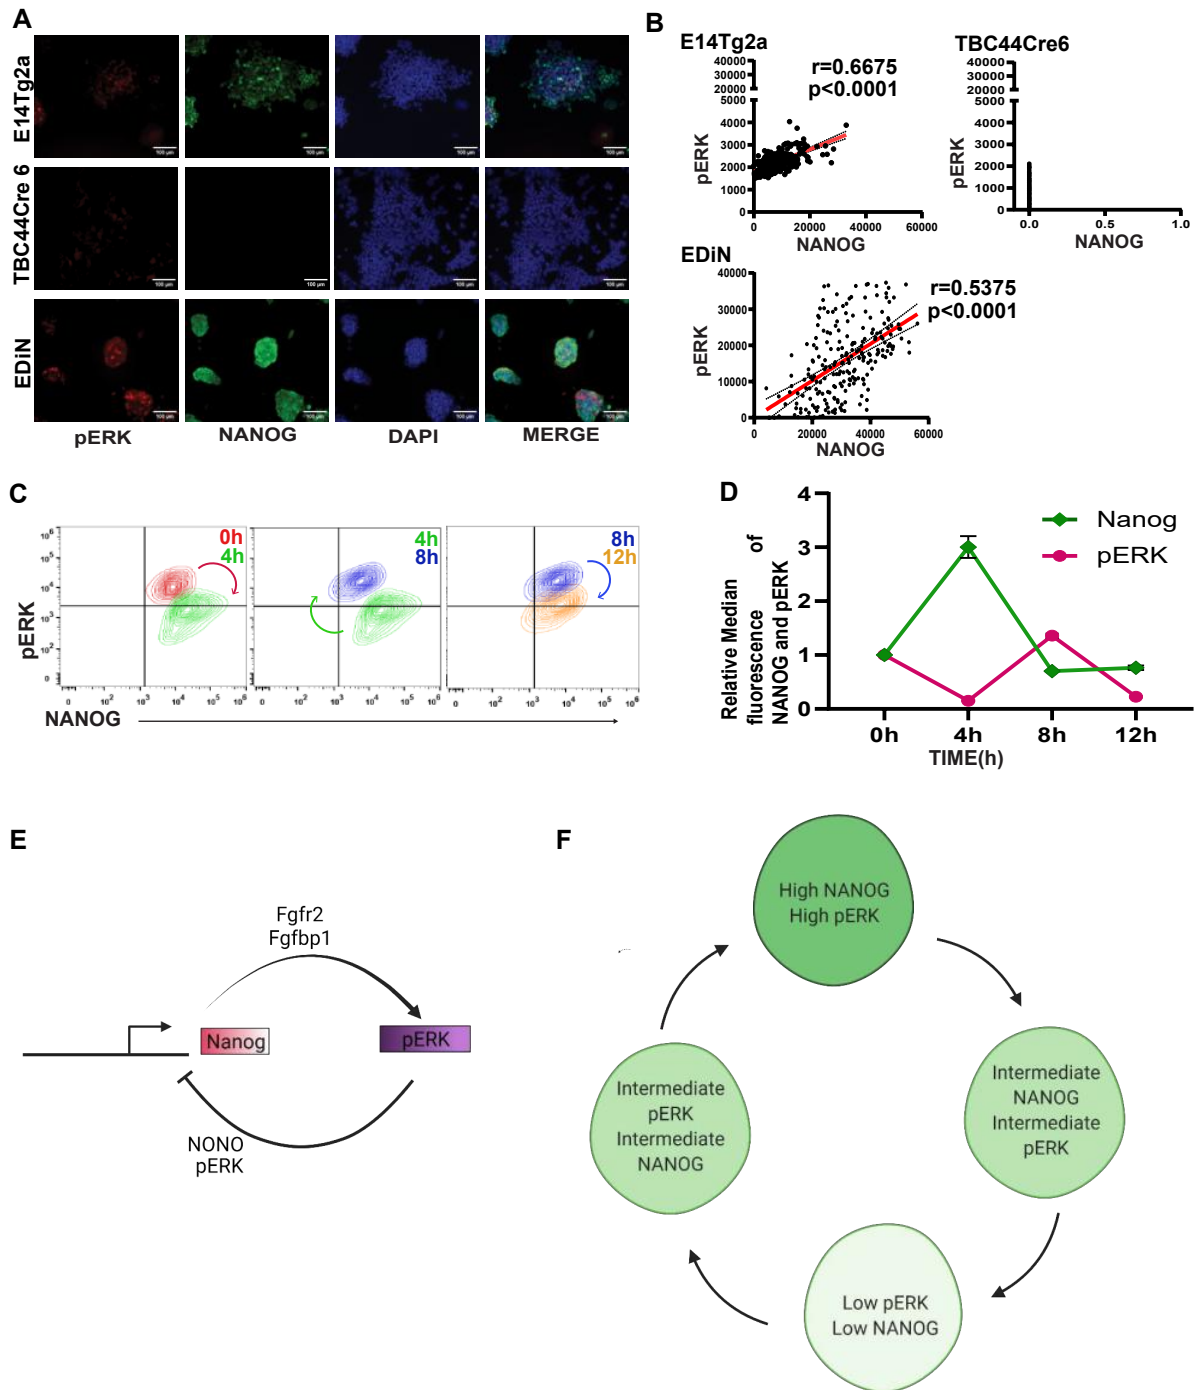



## Supplementary Information Text

### Subhead. Materials

| REAGENT or RESOURCE                           | SOURCE                    | IDENTIFIER                        |
|-----------------------------------------------|---------------------------|-----------------------------------|
| Antibodies                                    |                           |                                   |
| Anti-NANOG                                    | Thermo Scientific Fisher  | Cat# 14-5761-80, RRID: AB_763613  |
| Anti-NANOG                                    | Cell signaling Technology | Cat# 8822, RRID: AB_11217637      |
| Nanog Polyclonal Antibody                     | Thermo Scientific Fisher  | Cat# PA5-47376, RRID: AB_2607022  |
| Anti-OCT3/4                                   | Cell signaling Technology | Cat# 83932, RRID: AB_2721046      |
| Anti-OCT3/4                                   | Thermo Scientific Fisher  | Cat# 14-5841-82, RRID: AB_914301  |
| Anti-SOX 2                                    | Cell signaling Technology | Cat# AMAb91307, RRID: AB_2665892  |
| Anti-FGFR2                                    | Thermo Scientific Fisher  | Cat# PA1-24763, RRID: AB_780623   |
| Anti-FGFR2                                    | R&D Systems               | Cat# MAB6843, RRID: AB_2103395    |
| Anti-FGFR1                                    | Cell signaling Technology | Cat# 9740, RRID: AB_11178519      |
| FGFBP1 Polyclonal Antibody                    | Thermo Scientific Fisher  | Cat# PA5-77220, RRID: AB_2720947  |
| Anti-FGF4                                     | Thermo Scientific Fisher  | Cat# PA5-20483, RRID: AB_11152903 |
| Anti-ERK                                      | Cell signaling Technology | Cat# 9102, RRID: AB_330744        |
| Anti-P-ERK                                    | Cell signaling Technology | Cat# 4370, RRID: AB_2315112       |
| Anti-P-ERK                                    | Cell signaling Technology | Cat#9101, RRID: AB_331646         |
| Anti-Trimethyl Histone H3(Lys4) (C42D8)       | Cell signaling Technology | Cat# 9751, RRID: AB_2616028)      |
| Anti-Trimethyl Histone H3(Lys27)              | Merck Millipore           | Cat# 07-449, RRID: AB_310624      |
| Anti- $\beta$ -ACTIN                          | Sigma-Aldrich             | Cat# A2228, RRID: AB_476697       |
| Anti-HDAC2                                    | Thermo Scientific Fisher  | Cat# 51-5100; RRID: AB_2533908    |
| Anti-RNA polymerase II Antibody, clone CTD4H8 | Merck Millipore           | Cat# 05-623, RRID: AB_309852      |
| Chemicals, Peptides, and Recombinant Proteins |                           |                                   |
| rhFGF4                                        | R&D Systems               | Cat# 7460-F4-025                  |
| rhFGFBP1                                      | R&D Systems               | Cat# 1593-FB-025                  |
| Human FGF4 recombinant protein                | Thermo Scientific Fisher  | Cat# PHG0154                      |
| Human BMP4 recombinant protein                | Thermo Scientific Fisher  | Cat# PHC9534                      |
| Human EGF recombinant protein                 | Thermo Scientific Fisher  | Cat# 01-107                       |
| Human Insulin recombinant protein             | Thermo Scientific Fisher  | Cat# RP-10908                     |

|                                                                      |                      |        |                       |
|----------------------------------------------------------------------|----------------------|--------|-----------------------|
| Human bFGF recombinant protein                                       | Thermo Scientific    | Fisher | Cat# RP-8628          |
| G418 disulfate salt                                                  | Sigma-Aldrich        |        | Cat# A1720            |
| Doxycycline Hyclate                                                  | Sigma-Aldrich        |        | Cat# D9891            |
| SU5402                                                               | Sigma-Aldrich        |        | Cat# SML0443          |
| PD0325901                                                            | Sigma-Aldrich        |        | Cat# PZ0162           |
| CHIR99021                                                            | Sigma-Aldrich        |        | Cat# SML1046          |
| (Z)-4-Hydroxytamoxifen                                               | Sigma-Aldrich        |        | Cat# H7904            |
| LIF                                                                  | Made in-house        |        |                       |
| Heparan sulfate sodium salt                                          | Sigma-Aldrich        |        | Cat# H7640            |
| <i>o</i> -Phenylenediamine dihydrochloride                           | Sigma-Aldrich        |        | Cat# P8287            |
| Deposited Data                                                       |                      |        |                       |
|                                                                      |                      |        |                       |
| Experimental Models: Cell Lines                                      |                      |        |                       |
| E14Tg2a                                                              |                      |        | Chambers et al., 2007 |
| TNGA                                                                 |                      |        | Chambers et al., 2007 |
| TβC44Cre6                                                            |                      |        | Chambers et al., 2007 |
| TNERT                                                                | This Study           |        |                       |
| NiRFP2A                                                              | This Study           |        |                       |
| TDiN                                                                 | This Study           |        |                       |
| OGNM                                                                 | This Study           |        |                       |
| EDiN                                                                 | This Study           |        |                       |
| NisGFPDiN                                                            | This Study           |        |                       |
| NsGiR                                                                | This Study           |        |                       |
| TNERTFgfr2 <sup>-/-</sup>                                            | This Study           |        |                       |
| TNERTFgfr1 <sup>-/-</sup>                                            | This Study           |        |                       |
| TNERTFgf4 <sup>-/-</sup>                                             | This Study           |        |                       |
| TNERTFgfbp1 <sup>-/-</sup>                                           | This Study           |        |                       |
| TNERTNBR1 <sup>-/-</sup>                                             | This Study           |        |                       |
| TNERTNBR2 <sup>-/-</sup>                                             | This Study           |        |                       |
| TNERTNono <sup>-/-</sup>                                             | This Study           |        |                       |
| E14Tg2aFgf4 <sup>-/-</sup>                                           | This Study           |        |                       |
| E14Tg2aFgfr2 <sup>-/-</sup>                                          | This Study           |        |                       |
| E14Tg2aFgf4OE                                                        | This Study           |        |                       |
| Oligonucleotides                                                     |                      |        |                       |
| Oligos used for sgRNA cloning, genotyping, qPCR – RTPCR and ChIP-PCR | Supplemental Table 1 |        |                       |
| Recombinant DNA                                                      |                      |        |                       |
| pU6-(BbsI)-CBh-Cas9-T2A-mCherry                                      | Addgene 64324        |        | (Weber et al., 2015)  |
| Mouse Oct4-GFP GOF18 transgenic reporter                             | Addgene 60527        |        | (Gafni et al., 2013)  |
| Nanog iRFP670 Fusion Targeting vector                                | This Study           |        |                       |
| Nanog sfGFP Fusion Targeting vector                                  | This Study           |        |                       |
| Nanog-2A-mCherry                                                     | Addgene 59995        |        | (Faddah et al., 2013) |
| pEF6V5His-Fgf4                                                       | This Study           |        |                       |
| PEF6NanogERT2                                                        | This Study           |        |                       |
| PTripZ-FaNanog                                                       | This Study           |        |                       |

|                                   |                          |                  |
|-----------------------------------|--------------------------|------------------|
| pU6-iRFP                          | This Study               |                  |
| pU6-iRFP Sg-Fgf4                  | This Study               |                  |
| pU6-iRFP Sg-Fgfr1                 | This Study               |                  |
| pU6-iRFP Sg-Fgfr2                 | This Study               |                  |
| pU6-iRFP Sg-Fgfbp1                | This Study               |                  |
| pU6-iRFP Sg-Zfp281                | This Study               |                  |
| pU6-iRFP Sg-Nono                  | This Study               |                  |
| pU6-iRFP Sg-Fgfr2-NBR1            | This Study               |                  |
| pU6-iRFP Sg-Fgfr2-NBR2            | This Study               |                  |
| pU6-iRFP Sg-Nanog-Stop            | This Study               |                  |
| pMKiN                             | This Study               |                  |
| Software and Algorithms           |                          |                  |
| ImageJ                            | ImageJ                   | RRID: SCR_003070 |
| FlowJo                            | BD Bioscience            | RRID: SCR_008520 |
| Integrative genomics viewer       | Broad Institute          | RRID: SCR_011793 |
| SDS                               | Applied Biosystems       | RRID: SCR_015806 |
| Image Lab                         | Bio-rad                  | RRID: SCR_014210 |
| GraphPad Prism                    | GraphPad                 | RRID: SCR_002798 |
| Other                             |                          |                  |
| Pierce Protein A/G Magnetic beads | Thermo Scientific Fisher | Cat# 88803       |
| BD LSR Fortessa                   | BD Bioscience            | N/A              |
| MoFlo XDP                         | Beckman Coulter          | N/A              |
| Gallios Flowcytometer             | Beckman Coulter          | N/A              |
| Chemidoc MP imaging system        | Bio-rad                  |                  |
| Zeiss Axio Observer               | Zeiss                    | N/A              |

## Subhead. Methods

**Cell Culture:** The cell lines used in this study and their origin is depicted in Fig. S7. All the cells used in this study are derivatives of E14Tg2a ES. The cells were cultured as described earlier (5). 4-Hydroxytamoxifen (4-OHT), Doxycycline, and Cycloheximide were used at a concentration of 1  $\mu\text{g/ml}$ , 1  $\mu\text{g/ml}$ , and 100  $\mu\text{g/ml}$  respectively. The TNERT and its derivative cell lines were treated with 4-OHT for 18 hrs except when indicated. TDiN and EDiN were treated with Doxycycline for 48 hrs unless indicated. CHIR99021 (CHIR, PD0325901 (PD), and SU5402 were used at 3  $\mu\text{M}$ , 1  $\mu\text{M}$ , and 2  $\mu\text{M}$ , respectively, except when indicated. FGF4 and FGFBP1 were used at 50ng/ml concentration. The cells were cultured in Serum+ LIF (SL), SL+ PD (SLPD), SL+CHIR (SLCHIR), SL+SU5402 (SLSU5402), SL + PD +CHIR (SL2i) and N2B27+LIF+PD+CHIR (2iL) for at least 2 passages before treating with either 4-OHT or Doxycycline.

The cells were cultured on cell culture dishes coated with 0.1% gelatin for all experiments. The conditioned media from the cells was collected after the specific treatments or indicated time

points. The conditioned media was passed through a 0.22  $\mu$ M filter and added to T $\beta$ c44Cre6 or TNERT cells. The cells were cultured in the conditioned media for 24 hrs before FACS analysis.

**Generation of Knock-out cell lines using paired CRISPR constructs:** pU6-iRFP (pU6-Cas9-T2A-iRFP-2A-PuroR) construct was engineered by replacing mCherry coding sequence with iRFP670-2A-PuroR cassette in pU6-(BbsI)-CBh-Cas9-T2A-mCherry plasmid (Addgene 64324) by Gibson assembly. For generating knock-out of a gene, two sgRNAs were designed with the expected cutting sites at least 30 bps apart to achieve deletion of at least 30 bps or more. For genotyping of the deletions, a set of genotyping primers was designed outside the deletion region flanking the sgRNA pair. The sgRNAs were designed using the UCSC genome browser and Deskgen or Benchling. The sequences of the sgRNAs and the genotyping primers are detailed in Table S1. All sgRNAs were cloned into pU6-Cas9-T2A-iRFP-2A-PuroR plasmids. To generate a paired sgRNA construct, the U6-SgRNA cassette from one plasmid containing the sgRNA was amplified and Gibson assembled into the XbaI site of the plasmid containing the other sgRNA pair of the pair. Around 1  $\mu$ g of paired sgRNA CRISPR plasmid was nucleofected in 1 million cells. The transfected cells were sorted by FACS for iRFP expression and cultured to obtain clones. The clones were genotyped by PCR using respective primer sets to identify the heterozygous and homozygous clones. The sequence of the derivation of cell lines is described in Fig. S7.

**Western blot analysis:** The cells were harvested by using RIPA buffer with 25mM Tris HCl (pH 8.0), 150mM NaCl, 1%NP-40, 0.5% Sodium deoxycholate, 0.1% SDS and Complete Protease Inhibitor Cocktail Tablets (Roche). The protein samples were resolved by 4-20% gradient SDS-PAGE and electroblotted on to polyvinylidene difluoride (PVDF) membrane. The blot was blocked with 3% BLOTTO for an hour and incubated overnight with a primary antibody at 4°C. Blots were washed thrice with TBST and hybridized with secondary antibody and the blots were visualized using enhanced chemiluminescence (ECL) detection kit. Western blot quantifications were performed using Image lab (Bio-rad).

**Chromatin Immunoprecipitation (ChIP):** Cells were fixed by adding 270  $\mu$ L of 37% formaldehyde into 10 ml of media and incubated for 10 minutes at 37°C to crosslink the chromatin. Cells were washed twice with cold PBS containing protease inhibitors. Cells were scraped and harvested by centrifugation. The cell pellet was dissolved in 200  $\mu$ L of SDS Lysis Buffer (1% SDS, 10 mM EDTA, and 50 mM Tris, pH 8.0) containing protease inhibitors (per 10<sup>6</sup> cells) and incubated on ice for 10 min. The 25 cycles of sonication were used to shear DNA between 200 to 1000 base pairs. The sample was centrifuged at 13,000 rpm for 10 min (at 4°C). The supernatant was diluted by adding 1800  $\mu$ L ChIP Dilution Buffer (1.1% Triton X- 100, 1.2 mM EDTA, 16.7 mM Tris-HCl, pH 8.0, 167 mM NaCl with protease inhibitors). The 1% input was aliquoted from the supernatant. To reduce nonspecific background, diluted cell supernatant was preabsorbed for one hour at 4°C with protein

A/G magnetic beads (Invitrogen). The supernatant fraction was incubated overnight at 4°C with an appropriate antibody and protein A/G magnetic beads were blocked with 4% BSA, 2µg salmon sperm DNA. The next day, pre-blocked beads were mixed with the sample and incubated for 1 hour to capture the antibodies. The supernatant was discarded and washed in the given order with 1 mL of each of the buffers - Low Salt Wash Buffer (0.1% SDS, 1% Triton X-100, 2 mM EDTA, 20 mM Tris-HCl, pH 8.0, 150 mM NaCl), High Salt Wash Buffer (0.1% SDS, 1% Triton X-100, 2 mM EDTA, 20 mM Tris-HCl, pH 8.0, 500 mM NaCl), LiCl Wash Buffer (0.25 M LiCl, 1% IGEPAL-CA630, 1% deoxycholic acid, 1 mM EDTA, 10 mM Tris, pH 8.0.), and TE buffer. DNA was eluted with elution buffer (1%SDS, 0.1M NaHCO<sub>3</sub>). The sample input and the ChIP chromatin were reverse crosslinked with 20 µL of 5 M NaCl by heating at 65°C for 4 hours. Followed by one hour at 45°C with 10 µL of 0.5 M EDTA, 20 µL 1 M Tris- HCl, pH 6.5, and 2 µL of 10 mg/mL Proteinase K. Finally, DNA was eluted in 50 µL water using a minEleute PCR purification kit. Then 1µL of sample and input was used for qPCR analysis. The primers used for qPCR analysis were listed in Table S1.

**Co-Immunoprecipitation in ES cells:** 10-12 million ES cells were harvested by trypsinization, washed twice with cold PBS, and resuspended in 800 µl of CoIP Lysis Buffer (50 mM Tris-HCl, pH 6.7.5; 350 mM NaCl, 0.7% NP40, EDTA 0.1mM, 20% (v/v) glycerol, and protease inhibitor cocktail). The cell lysate was mixed with protein A/G magnetic beads for 1 hour at 4°C for pre-clearing the background. Then 5% input was aliquoted and the remaining supernatant was incubated overnight with appropriate primary antibody. The protein A/G magnetic beads were blocked overnight at 4°C with 200 µl of CoIP Lysis buffer containing 4% BSA. The next day, the beads were transferred to the primary antibody incubated tubes and incubated for one hour at 4°C. The bead was washed three times with ice-cold TBS150 (50mM Tris, 150mM NaCl) and the protein was eluted with 2X sample buffer (125 mM Tris-HCl, pH 6.8, 4% SDS, 20% (v/v) glycerol, 0.004% bromophenol blue), by boiling for 5 min. The western was done for sample and input and the interaction was analyzed.

**Immunocytochemistry:** The cells were cultured in 24 well dishes and fixed in 3.7% formaldehyde diluted in PBS for 15 mins at RT. After 3 washes with PBS, the cells were permeabilized and blocked with PBS containing 0.5% BSA and 0.3% Triton-X100 for 1 hour at room temperature. The cells were hybridized with primary antibody (1:100 dilution) in PBS containing 0.5% BSA at 4°C overnight in a humidified chamber. The cells were washed three times with PBS and hybridized to appropriate secondary antibody at 1:1000 dilution room temperature for 1hour. The nuclei were stained with DAPI in 1X PBS for 20 min at room temperature. The cells were washed thrice with PBS. The cells were layered with 100 µl of the mixture of PBS and Glycerol (1:1) and the images were acquired on the ZEISS Axio observer microscope and analyzed using ImageJ software.

**ELISA Assay:** The condition media from the cell lines was collected at the respective time points. 100  $\mu$ l of the media was coated per well of 96 wells of ELISA plate by incubating overnight at 4°C. The wells were washed thrice with PBS containing 0.05% Tween-20 and blocked with PBS containing 2% BSA for one hour at room temperature. The wells were washed once with PBS and incubated with the appropriate primary antibody (1:100) for one hour. Washed thrice with PBST, an appropriate HRP-labeled secondary antibody was hybridized for one hour at room temperature. The wells were washed thrice with PBST and incubated in substrate solution OPD (o-phenylenediamine dihydrochloride) 3mg/ml with 6  $\mu$ l/ml H<sub>2</sub>O<sub>2</sub>) for 30 min in dark. The reaction was stopped by using 2N H<sub>2</sub>SO<sub>4</sub>. The absorbance was measured at 492 nm in Power wave XS2 (Bio Tek instruments).







population median of TDiN in indicated treatments (n=3). (E) *Nanog*:GFP population median of TNERT, NsGFPDiN, and TDiN treated with SU5402, with OHT/Doxycycline or no OHT/Doxycycline. (F) (top) CRISPR-based knock-out strategy using paired sgRNA to knock-out *Fgf4* in TNERT. The sgRNAs are positioned at the beginning and the near end of exon II. The deletion results in the loss of the start codon and a part of the coding region in exon II. The dotted line represents the deleted region of the gene. FP and RP represent the relative positions of the genotyping primers. (Middle left) genotyping PCR of TNERT*Fgf4*<sup>-/-</sup> clones. The WT allele gives an amplicon of 332 bp and the knock-out allele a smaller amplicon by 32 bps or more. (Middle right) The relative abundance of FGF4 in media of TNERT and TNERT*Fgf4*<sup>-/-</sup> clones 48 hrs after OHT treatment. (Bottom) Chromatogram of the TNERT*Fgf4*<sup>-/-</sup> clones showing the sequences at the junction of the deletion. (G) (top) Schematic of the gene structure of *Fgfbp1* and the relative positions of the two sgRNAs used for paired sgRNA knock-out strategy. One sgRNA is complimentary to 5'UTR and the other to the 3' end of the coding region of the only exon. (Middle left) Genotyping PCR showing a WT amplicon of 1220 bps and an amplicon around 400 bps in case of deletion. (Middle right) The relative abundance of FGFBP1 in media of TNERT and TNERT*Fgfbp1*<sup>-/-</sup> clones 48 hrs after OHT treatment. (Bottom) Chromatogram of the TNERT*Fgfbp1*<sup>-/-</sup> clone showing the sequences at the junction of the deletion. (H) Strategy for knock-out of *Fgfr1* in TNERT cells. The schematic depicts the gene structure of *Fgfr1* with the relative positions of the two sgRNAs. One sgRNA targets the 3'end of Intron 8 and the other exon10. (Middle left) Genotyping PCR shows a WT allele amplicon at 494 bp and a knock-out allele with smaller amplicons around 150 bp. (Middle right) Western blot analysis of FGFR1 in TNERT and TNERT*Fgfr1*<sup>-/-</sup> clones. (Bottom) chromatogram showing the sequence of the deleted region. (I) A paired sgRNA strategy to knock-out *Fgfr2* in TNERT. (Top) The schematic represents the *Fgfr2* gene structure, with relative positions of the sgRNAs. One sgRNA target exon2 and the other sgRNA targets the coding region of the last exon approximately 100 kb apart. The dotted line represents the region of deletion in the *Fgfr2* gene. (Middle left) PCR genotyping shows a 665 bp amplicon when at least one allele of *Fgfr2* is deleted. This genotyping strategy cannot distinguish between +/- and -/- genotypes. (Middle right) Western blot analysis of FGFR2 protein in the *Fgfr2* targeted clones distinguishing the +/- and -/- clones. (Bottom) chromatogram represents the sequence of the genotyping amplicon indicating the exact sites of deletion. All error bars in the figure represent s.e.m.

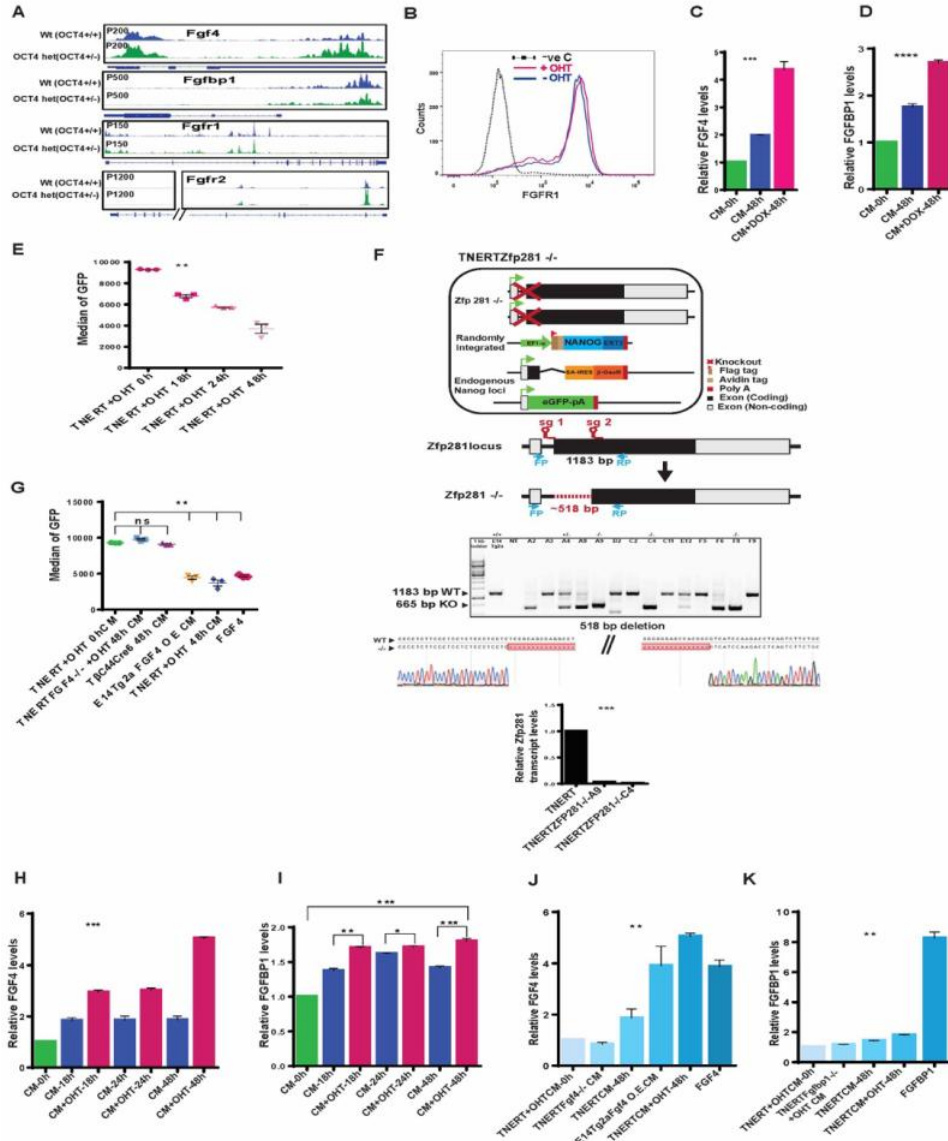

**Fig. S3. *Nanog* enhances expression of FGF autocrine signaling pathway components.** (A) Browser tracks of NANOG enrichment in Fragment Per Kilobase of transcripts per Million (FPKM) in Oct4<sup>+/+</sup> cells (normal NANOG levels) and Oct4<sup>+/-</sup> cells (higher NANOG levels) (Karwacki-Neisius et al., 2013) at *Fgf4*, *Fgfbp1*, *Fgfr1*, and *Fgfr2* loci. (B) Histogram of FGFR1 expression on the cell surface analyzed by immunostaining and FACS of fixed but unpermeabilized TNERT cells treated with (red) or no OHT (blue). (C, D) ELISA-based relative quantification of FGF4 and FGFBP1 in media from EDiN cells cultured with or no Doxycycline (n=3). EDiN cell was generated by introducing a Doxycycline inducible Flag-Avi-NANOG transgene in E14Tg2a cells. (E) *Nanog*:GFP population median of T $\beta$ c44Cre6 treated with OHT induced conditioned media collected after different time points (n=3). (F) (top) Schematic of TNERTZfp281<sup>-/-</sup> cells, (upper-middle) CRISPR based paired guide knock-out strategy indicating the relative position of the sgRNAs, FP and RP indicate the genotyping primers. (Lower middle) Genotyping PCR indicating +/- and -/- clones. (Bottom) The sequencing chromatogram of the deleted region confirms the exact site of deletion, followed by RT-qPCR analysis of the *Zfp281* transcripts. (G) *Nanog*:GFP population median of T $\beta$ c44Cre6 treated with conditioned media from TNERT+OHT 0 hrs, TNERTFGF4<sup>-/-</sup>+OHT 48 hrs, T $\beta$ c44Cre6 48 hrs, E14Tg2a-FGF4-OE (overexpression) 48 hrs, TNERT+OHT 48 hrs and 50ng/ml FGF4 (n=3). (H, I) ELISA-based relative quantities of FGF4 and FGFBP1 in media

from TNERT after 18, 24, and 48 hrs of OHT treatment (n=3). (J) ELISA-based relative quantities of FGF4 in conditioned media from cell lines -TNERT+ OHT 0 hrs, TNERTFGF4-/- + OHT 48 hrs, E14Tg2a-FGF4-OE 48 hrs (overexpression), TNERT-/+OHT 48 hrs, and 50ng/ml FGF4 (n=3). (K) ELISA-based relative quantities of FGFBP1 in conditioned media from various cell lines - TNERT+ OHT 0 hrs, TNERT-Fgfbp1-/- 48 hrs +OHT, TNERT 48 hrs -/+ OHT, and 50 ng/ml FGBP1 (n=3). All error bars in the figure represent s.e.m.

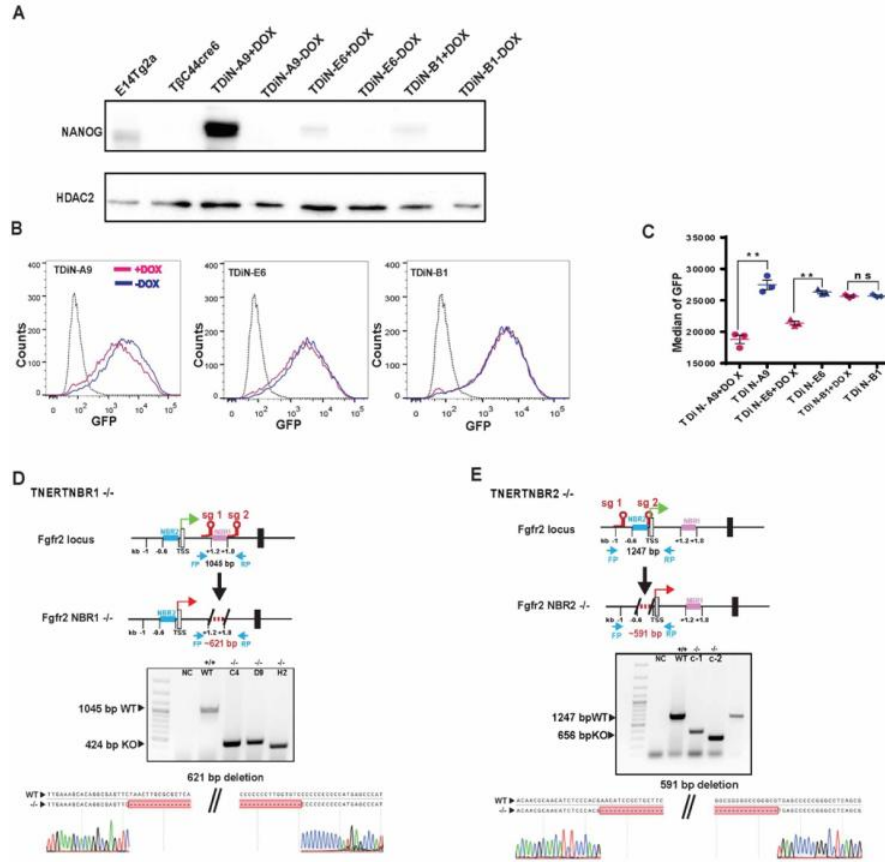

**Fig. S4. NANOG induced FGFR2 triggers autoregulation predominately in the ES cell population with higher *Nanog* expression.** (A) Western blot analysis of Flag-Avi-NANOG in different clones of TDiN treated with or no Doxycycline showing different levels of NANOG expression relative to E14Tg2a. The clones show different levels of expression Flag- Avi-NANOG upon Doxycycline treatment. (B) FACS profiles of *Nanog*:GFP in TDiN clones treated with or no Doxycycline. (C) *Nanog*:GFP population median of TDiN clones (n=3). (D) (top) Schematic of strategy for deletion of NANOG Binding Region 1 (NBR1) in TNERT indicating the position of the NBR1 and the relative position of the sgRNA pair. The sgRNAs are complementary to sequences around 1.2 kb and 1.8 kb downstream of TSS. FP and RP indicate the relative position of the primers for genotyping. (middle) Genotyping of TNERT NBR1 knock-out clones. The WT shows an amplicon of 1045 bp, upon deletion around 600 bp sequence comprising multiple NANOG binding sites is deleted. (bottom) Sequence and chromatogram of the genotype PCR amplicon indicating the exact sequence of the junction of deletion in TNERTNBR1-/- clone. (E) Schematic of strategy for deletion of NANOG Binding Region 2 (NBR2) in TNERT indicating the position of NBR2 and relative position of the sgRNA pair. The sgRNAs are complementary to sequences around TSS and 0.6 kb upstream of TSS of *Fgfr2*. (middle) Genotyping of the TNERTNBR2 knock-out clones. The WT shows an amplicon of 1247 bp. The knock-out would lead to deletion of around 690 bps and a smaller amplicon of around 650 bps. (bottom) Sequence and chromatogram of the PCR amplicon from TNERT knock-out clones showing the exact site of deletion in TNERT NBR2-/- clone. All error bars in the figure represent s.e.m.



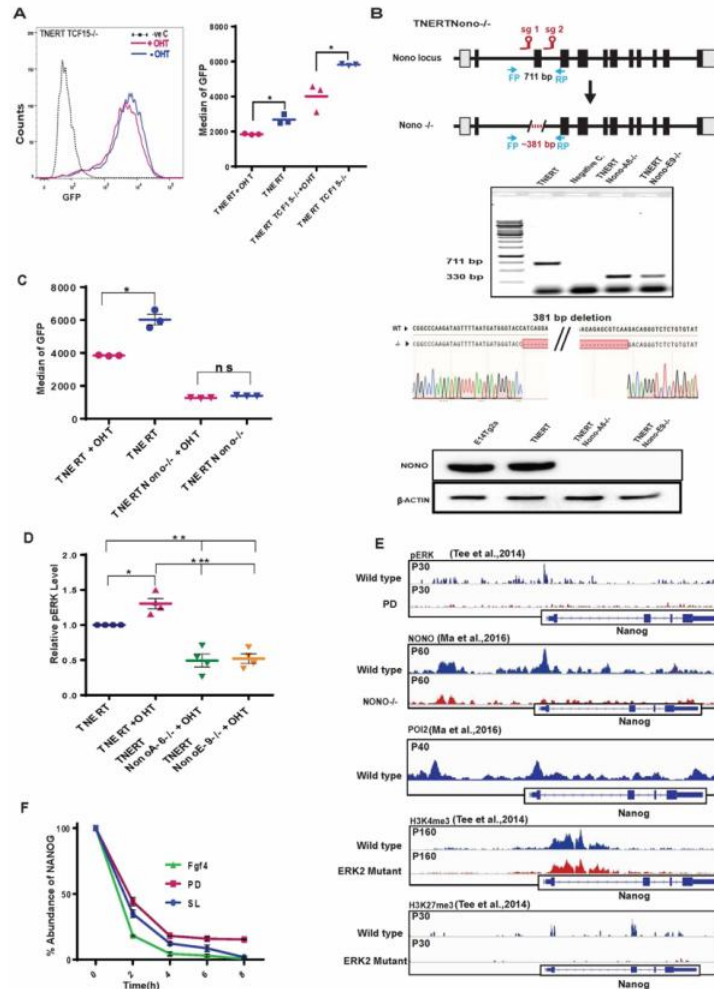

**Fig. S5. ERK interacts and recruits NONO to repress *Nanog* transcription.** (A) (Left) FACS profile of TNERTTCf15<sup>-/-</sup> treated with or no OHT (n=3). (Right) *Nanog*:GFP population median of TNERT and TNERTTCf15<sup>-/-</sup> treated with or no OHT (n=3). (B) A CRISPR-based knock-out strategy using paired sgRNA, to knock-out of *Nono* in TNERT cells. (Top) The schematic represents the mouse *Nono* gene structure with relative positions of the two sgRNAs flanking the second coding exon of *Nono*. FP and RP indicate the relative position of genotyping primers. The dotted line indicates the region of deletion in the *Nono* gene. (Middle) Genotyping PCR of the *Nono*<sup>-/-</sup> deletion in TNERT. The WT allele gave an amplicon of 711 bp and the deleted allele shows a smaller amplicon of 330 bp; followed by sequence and chromatogram indicating the deletion site (bottom) Western blot analysis of NONO protein in TNERT and TNERT*Nono*<sup>-/-</sup> clones. (C) *Nanog*:GFP population median of TNERT and TNERT*Nono*<sup>-/-</sup> treated with or no OHT (n=3). (D) The relative abundance of pERK in TNERT treated with or no OHT and TNERT*Nono*<sup>-/-</sup> with OHT (n=4). (E) Browser tracks of pERK, NONO, POL2, H3K4me3, H3K27me3 enrichment in Fragment Per Kilobase of transcripts per Million (FPKM) on *Nanog* gene (Ma et al., 2016; Tee et al., 2014). (F) The relative abundance of NANOG after 0, 2, 4, 6, and 8 hrs of Cycloheximide (CHX) chase cultured in SL, PD, and FGF4 (n=3). All error bars in the figure represent s.e.m.

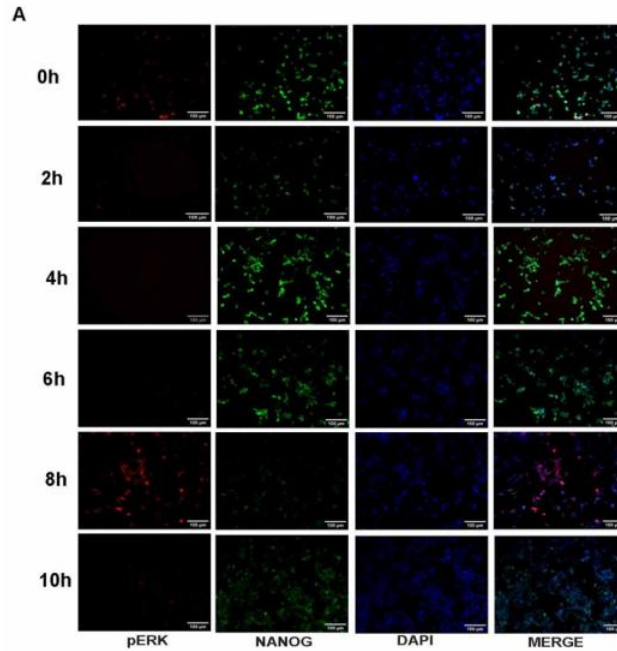

**Fig. S6. NANOG regulates ERK signaling dynamics and heterogeneity.** (A) Immunocytochemistry at different time intervals of culture of NiRFP2A ESCs after sorting of 10% of *Nanog*-high cells. pERK (red), NANOG (green) and nuclear stain (blue). pERK and NANOG were detected in 10% *Nanog*-high cells immediately after sorting. Some of the cells expressed both pERK and NANOG. pERK decreased drastically within 2 hrs of culture. pERK1//2 was lowest at 4 hrs with concomitant high expression of NANOG. pERK expression was increased by 8 hrs coinciding with decreased NANOG. The pERK expression decreased by 10 hrs with increase in NANOG.

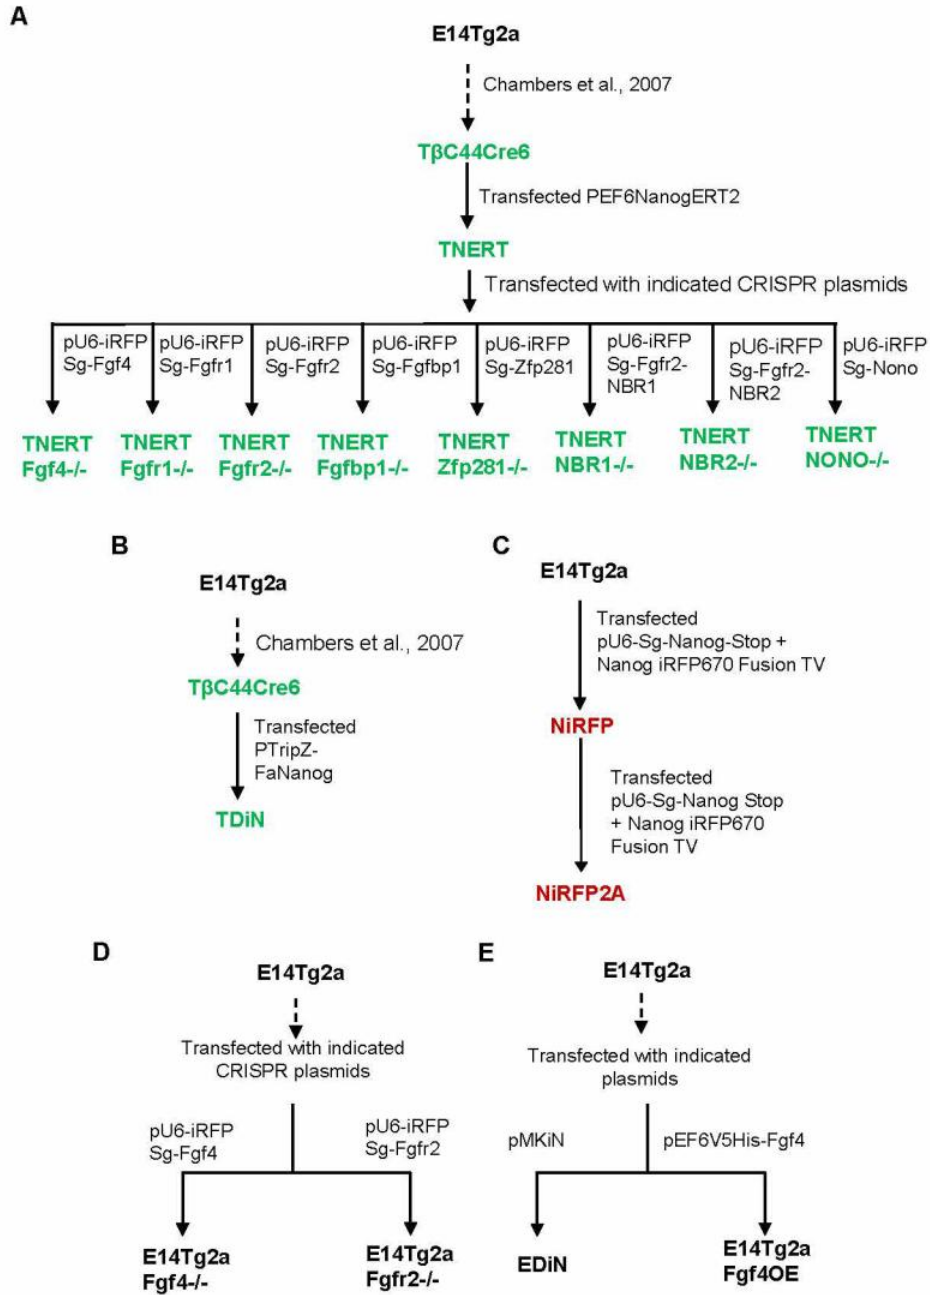

**Fig. S7: A pedigree chart of cell lines used in this study.** (A) Flow chart illustrating the lineage and process of generation of TNERT and generation of knock out cells lines in TNERT background. (B) A flow chart describing derivation of TDiN. (C) A flow chart depicting derivation of NiRFP2A from E14Tg2a. (D) A flow chart depicting derivation of *Fgf4*<sup>-/-</sup> and *Fgfr2*<sup>-/-</sup> ES cell lines from E14Tg2a. (E) A flowchart depicting derivation of EDiN and *Fgf4*OE (over expression) ES cell lines from E14Tg2a.

**Table S1. Oligonucleotide sequences used in this study.**

| Name of the Oligo                        | Sequence                                                |
|------------------------------------------|---------------------------------------------------------|
| <b>Oligos for paired sgRNA Knock-out</b> |                                                         |
| Fgf4 sgRNA1                              | CACCGCCGTGCGTGAGTTCGAGCTG<br>AAACCAGCTCGAACTCACGCACGGG  |
| Fgf4 sgRNA2                              | CACCGCGAAACGCGGGCCGACCAC<br>AAACGTGGTCGGCCCGCGTTTCGC    |
| Fgfr1 sgRNA1                             | CACCGCGTCATCATCTTCCGAGGAT<br>AAACATCCTCGGAAGATGATGACGC  |
| Fgfr1 sgRNA2                             | CACCGTTCTCTGGGGATGTCCAGTA<br>AAACTACTGGACATCCCCAGAGAAC  |
| Fgfr2 sgRNA1                             | CACCGCTGGGGGCGTTCATCTGCC<br>AAACGGCAGATGAAGCGCCCCCAGG   |
| Fgfr2 sgRNA2                             | CACCGCTCAGTGTAAGTAGGTTCC<br>AAACGGAACCTACTTACACTGAGC    |
| Fgfbp1 sgRNA1                            | CACCGCACAGTCTTGGCCACATTA<br>AAACTAATGTGGGCCAAGACTGTGC   |
| Fgfbp1 sgRNA2                            | CACCGATGTCGCCTGTAACATGTTG<br>AAACCAACATGTTACAGGCGACATC  |
| Fgfr2 NBR1 sgRNA1                        | CACCGTCGGAGCAGCTAGGCCAACT<br>AAACAGTTCGCCTAGCTGCTCCGAC  |
| Fgfr2 NBR1 sgRNA2                        | CACCGTTGTGTTTAGGGCCCCCCT<br>AAACAGGGGGGGCCCTAAACACAAC   |
| Fgfr2 NBR2 sgRNA1                        | CACCGTGGAAGCAGCGGATGTTCGT<br>AAACACGAACATCCGCTGCTTCCAC  |
| Fgfr2 NBR2 sgRNA2                        | CACCGACCGGAGCTGCTCTCGGATC<br>AAACGATCCGAGAGCAGCTCCGGTC  |
| Nanog -stop codon sgRNA                  | CACCGTATGAGACTTACGCAACATC<br>AAACGATGTTGCGTAAGTCTCATAG  |
| Zfp281 sgRNA1                            | CACCGAGGCCTGGCTGCGGAGAGG<br>AAACCCTCTCCGCAGCCAGGCCTC    |
| Zfp281 sgRNA1                            | CACCGCGGGGTATGAAAATCGGCAG<br>AAACCTGCCGATTTTTCATACCCCGG |
| Nono sgRNA1                              | CACCGTTTTAATGATGGGTACCATC<br>AAACGATGGTACCCATCATTAAAAC  |
| Nono sgRNA1                              | CACCGTTCGAGAGAGCGTCAAGAC<br>AAACGTCTTGACGCTCTCTCGGAAC   |
| <b>Genotyping primers</b>                |                                                         |
| Fgf4 knock-out                           | CGCAGCACTCACCGAACTCA<br>TGCCACGTTGCAGTAGAGC             |
| Fgfr1 knock-out                          | GTCTAGACAGGGCGAATGCTGTTT<br>ACTTGAACCTCACCGTCTTGGCAG    |
| Fgfr2 knock-out                          | TCTGGGTTTAAGCAAGTTGGCACT<br>CAGCATACATGGTGGGTCAGAGAG    |
| Fgfbp1 knock-out                         | GAAAGTGAGAAGCTGAGTGAATGG<br>TATATGCACCTAGGTTTGTGGTCC    |
| Fgfr2 NBR1 knock-out                     | GAAGAACTGCTGGAGTGTGGTCA<br>AGGGTAGTTCCAGGATACCTCAGC     |
| Fgfr2 NBR2 knock-out                     | AGAGGCTTTGGATGACTCTGCAAC<br>GCGATGATCTCGGAGGAAAACCTCC   |

|                           |                                                                  |
|---------------------------|------------------------------------------------------------------|
| Zfp281 knock-out          | TGTGGAGAGGACGGCGTTATTTTT<br>TGAAACCCATACTACACTGGCTGC             |
| Nono Knock out            | AGGTTTCCCTGCTTGTCTTTGTCT<br>GCAGCAACGCCCTTAATTTCAACA             |
| Nanog-iRFP670             | ACCCAGGGGTGACAAAGTATTCCAA<br>GCATTTTCCGTAATGCGCGTGATCC           |
| Nanog-sfGFP               | ACCCAGGGGTGACAAAGTATTCCAA<br>CGTTTGTAGCATCACCTTCACCCTC           |
| Nanog-T2AmCherry          | ACCCAGGGGTGACAAAGTATTCCAA<br>TCGCCCTTGCTCACCATTGGCCCGGGATTCTCTTC |
| <b>q-RT-PCR primers</b>   |                                                                  |
|                           | CTGCCATTAATGTGGCCATCCC                                           |
| <i>Dusp6</i>              | GTGTTCTCATTCCAGTCGCTGC                                           |
| <i>Nanog</i>              | TGGTCCCACAGTTTGCCTAGTTC                                          |
|                           | CAGGTCTTCAGAGGAAGGGCGA                                           |
| <i>Oct4</i>               | GTGGAGGAAGCCGACAACAATGA                                          |
|                           | CAAGCTGATTGGCGATGTGAG                                            |
| <i>Sox2</i>               | TTTTCTAGTCGGCATCACCG                                             |
|                           | ACAAGAGAATTGGGAGGGGT                                             |
| <i>Klf4</i>               | GTGCAGCTTGACAGCAGTAAC                                            |
|                           | AGCGAGTTGGAAAGGATAAAGTC                                          |
| <i>Rex1</i>               | CAGTCCAGAATACCAGAGTGGAA                                          |
|                           | ACTCTAGGTATCCGTCAGGGAAG                                          |
| <i>Fgfr2</i>              | CCCTGCGGAGACAGGTAACAG                                            |
|                           | AGCGTCAGCTTATCTCTGGGGA                                           |
| <i>Fgfr1</i>              | ACCCTGTAGCTCCCTACTGGAC                                           |
|                           | TGGCATAGCGAACCTTGTAGCC                                           |
| <i>Fgf4</i>               | ACACGAGGGACAGTCTTCTGGA                                           |
|                           | TAGGCGTTGTAGTTGTTGGGCA                                           |
| <i>Fgfbp1</i>             | CTAACCTCAAGCTGGTGAACCCC                                          |
|                           | TCTCTAATGGCCATGGTCTGGGT                                          |
| <i>Gapdh</i>              | CAACGGCACAGTCAAGGCCGA                                            |
|                           | CCCTTCAAGTGGGCCCCCGG                                             |
| <i>Spry2</i>              | CCACCGATTGCTTGAAGTTGG                                            |
|                           | AGGTCTTGGCAGTGTGTTCCACC                                          |
| Pre- <i>Nanog-1</i>       | AGCCCAGTACTCAGGCTTGT                                             |
|                           | AGCATCACAACACGCACCT                                              |
| Pre- <i>Nanog-2</i>       | GCCAGCAGATGGCATAATTT                                             |
|                           | TGATGGCAATGCTGAGGTTA                                             |
| Pre- <i>Oct4</i>          | GTCCCAGCTGGTGTGACTCT                                             |
|                           | TCTTCTGCTTCAGCAGCTTG                                             |
| Pre- <i>Fgf4</i>          | GACTACCTGCTGGGCCTCAAAA                                           |
|                           | TACTCAGCCCCGAGACTACTAC                                           |
| Pre- <i>Fgfr2</i>         | CCCGTCCCTTCCCAAATCTGATA                                          |
|                           | TCACCTTGGGTCAGGATAACAAG                                          |
| Pre- <i>Fgfbp1</i>        | GACTACCTGCTGGGCCTCAAAA                                           |
|                           | TACTCAGCCCCGAGACTACTAC                                           |
| Pre- <i>Fgfr1</i>         | CCCGTCCCTTCCCAAATCTGATA                                          |
|                           | TCACCTTGGGTCAGGATAACAAG                                          |
| <b>q-ChIP-PCR primers</b> |                                                                  |

|                |                                                      |
|----------------|------------------------------------------------------|
| Nanog 5.5 kb   | GTGGGTGCACACAGAGAACAAC<br>CTGAGAGCTCAGGCCACAAAG      |
| Nanog -4.9 kb  | AACATTCCTTTCCCACCCACA<br>AAGAGGTGGCTGGTAGCCAAAA      |
| Nanog -4.7 kb  | TGGGGTAAACTTAAGGCTATGG<br>AGCTCTAAGCCGGTTCTCATT      |
| Nanog -3.9 kb  | CCCTACCTCTCCTGAGGTGTGA<br>CATGCCTGAGGAAGTCAGAGGA     |
| Nanog -3.4 kb  | TGTAGCCCTTGGTTAGTCCGAG<br>GGCAGGCATCACCAAAGTCATT     |
| Nanog -1.9 kb  | GGTTCAGTCAGGCTGGGCAAT<br>CTGCTGCCACACTATCACTGTC      |
| Nanog -1.0 kb  | AGCCGACTTAAGCTGGGTTAGA<br>TGCTCTAGCTGGTCCCAAATC      |
| Nanog -0.05 kb | TAGGGTAGGAGGCTTGAGGGG<br>AAGTCAGAAGGAAGTGAGCCGC      |
| Nanog +.5 kb   | CCGGTGATACGTTGGCCTTCTA<br>ACTGCCCCCGAACATATTCCAA     |
| Nanog +1.4 kb  | GTTAGGAATGAACGGGTGGGGA<br>AGTAGACAGCCCTGAAAGCAGC     |
| Fgf4 +3.5 kb   | GCCCAGAACCCAATTTTTATGCAC<br>CAAAGTCCCAGAGCCATTCCCTT  |
| Fgf4 -3.0 kb   | TTAGCTCGCTTACAGGGAATGCTT<br>TTGCTGTCTGTAGCCTCCCATAA  |
| Fgf4 -6.5 kb   | CACAAAGGTGCTTAAGTGGTGG<br>ACACGATTTCCAGACTCCTCCAG    |
| Fgf4 -6.9 kb   | TTAGGCACCCAAAGGCAGAATTG<br>GTCCTGTTATTCATGGCAGGGGA   |
| Fgfr1-5kb      | TGGCCTTGGATGAATTGTTGGC<br>TTCCACCTCCCTTACAGGACACT    |
| Fgfr1+2.5 kb   | TGGGGTGGTGTCTCTTCTTTTCCAG<br>CAAGCCATTAGGGAGGGAGGCAA |
| Fgfbp1-1.4 kb  | TCCAGTGTGTGTGGTAAACAGGT<br>AACACTGCCTCTGGATGGTCTAC   |
| Fgfr2 -2.5 kb  | TTTTGTCCCATTCTTGGGGC<br>AATCTTCCACCAGCCTGGACTC       |
| Fgfr2 -4.4 kb  | AAACAACGTAACGCATCCACTGT<br>TGCACAGATGACCTCTCGGAAC    |

## SI References

1. I. Chambers *et al.*, Nanog safeguards pluripotency and mediates germline development. **450**, 1230-1234 (2007).
2. D. A. Faddah *et al.*, Single-cell analysis reveals that expression of nanog is biallelic and equally variable as that of other pluripotency factors in mouse ESCs. **13**, 23-29 (2013).
3. T. Weber *et al.*, Increasing the efficiency of homology-directed repair for CRISPR-Cas9-induced precise gene editing in mammalian cells. *Nature biotechnology* **33**, 543-548 (2015).



4. O. Gafni *et al.*, Derivation of novel human ground state naive pluripotent stem cells. *Nature* **504**, 282-286 (2013).
5. N. Festuccia *et al.*, Esrrb is a direct Nanog target gene that can substitute for Nanog function in pluripotent cells. **11**, 477-490 (2012).
6. V. Karwacki-Neisius *et al.*, Reduced Oct4 expression directs a robust pluripotent state with distinct signaling activity and increased enhancer occupancy by Oct4 and Nanog. **12**, 531-545 (2013).
7. W.-W. Tee, S. S. Shen, O. Oksuz, V. Narendra, D. J. C. Reinberg, ERK activity promotes chromatin features and RNAPII phosphorylation at developmental promoters in mouse ESCs. **156**, 678-690 (2014).
8. C. Ma *et al.*, Nono, a bivalent domain factor, regulates Erk signaling and mouse embryonic stem cell pluripotency. **17**, 997-1007 (2016).
